# Supplementary material for: Transcriptome Analysis and Reactive Oxygen Species Detection Suggest Contrasting Molecular Mechanisms in Populus canadensis’ Response to Different Formae Speciales of Marssonina brunnea
Source: MDPI journal article supplement (doi:10.3390/genes15010116), 2024-01-18

**Supplementary Figure S1.** Correlation among RNA-seq samples. **(A)** heat map of the Pearson correlation of sequenced samples based on the expression data of all genes. **(B)** principal component analysis (PCA) of RNA-seq samples based on the expression data of all genes.

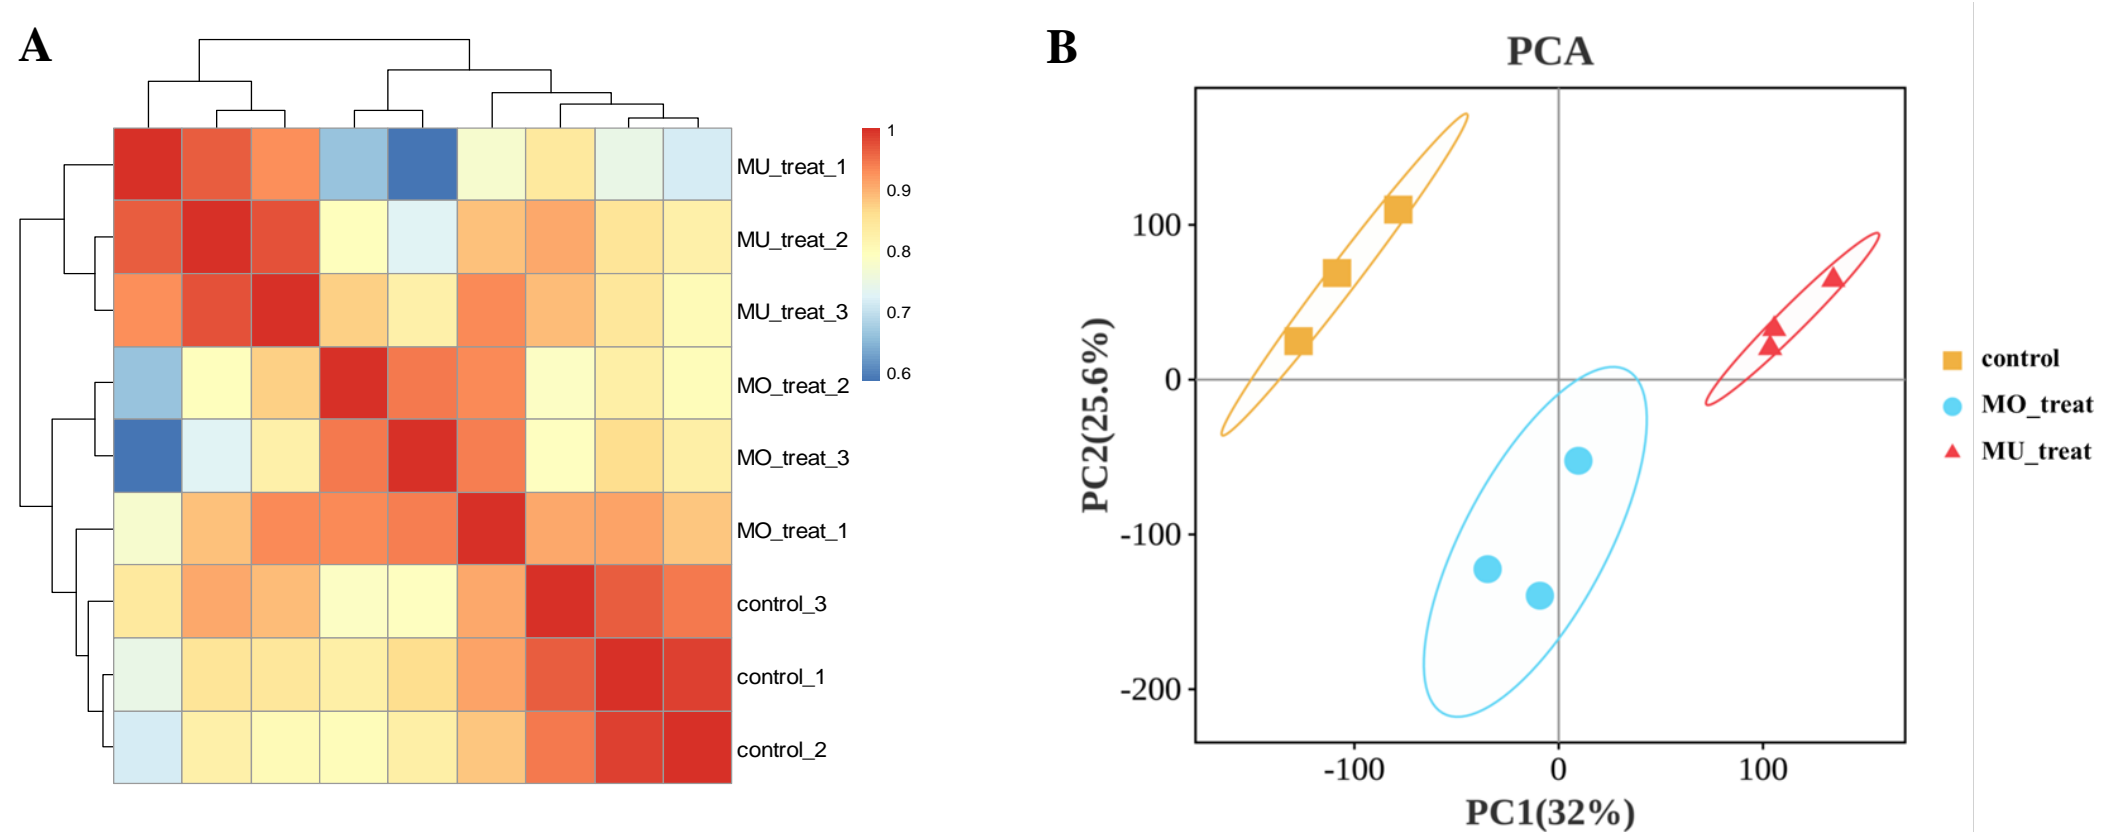

Supplementary Figure S2. Comparison of expression values measured by qRT-PCR and RNA-seq.

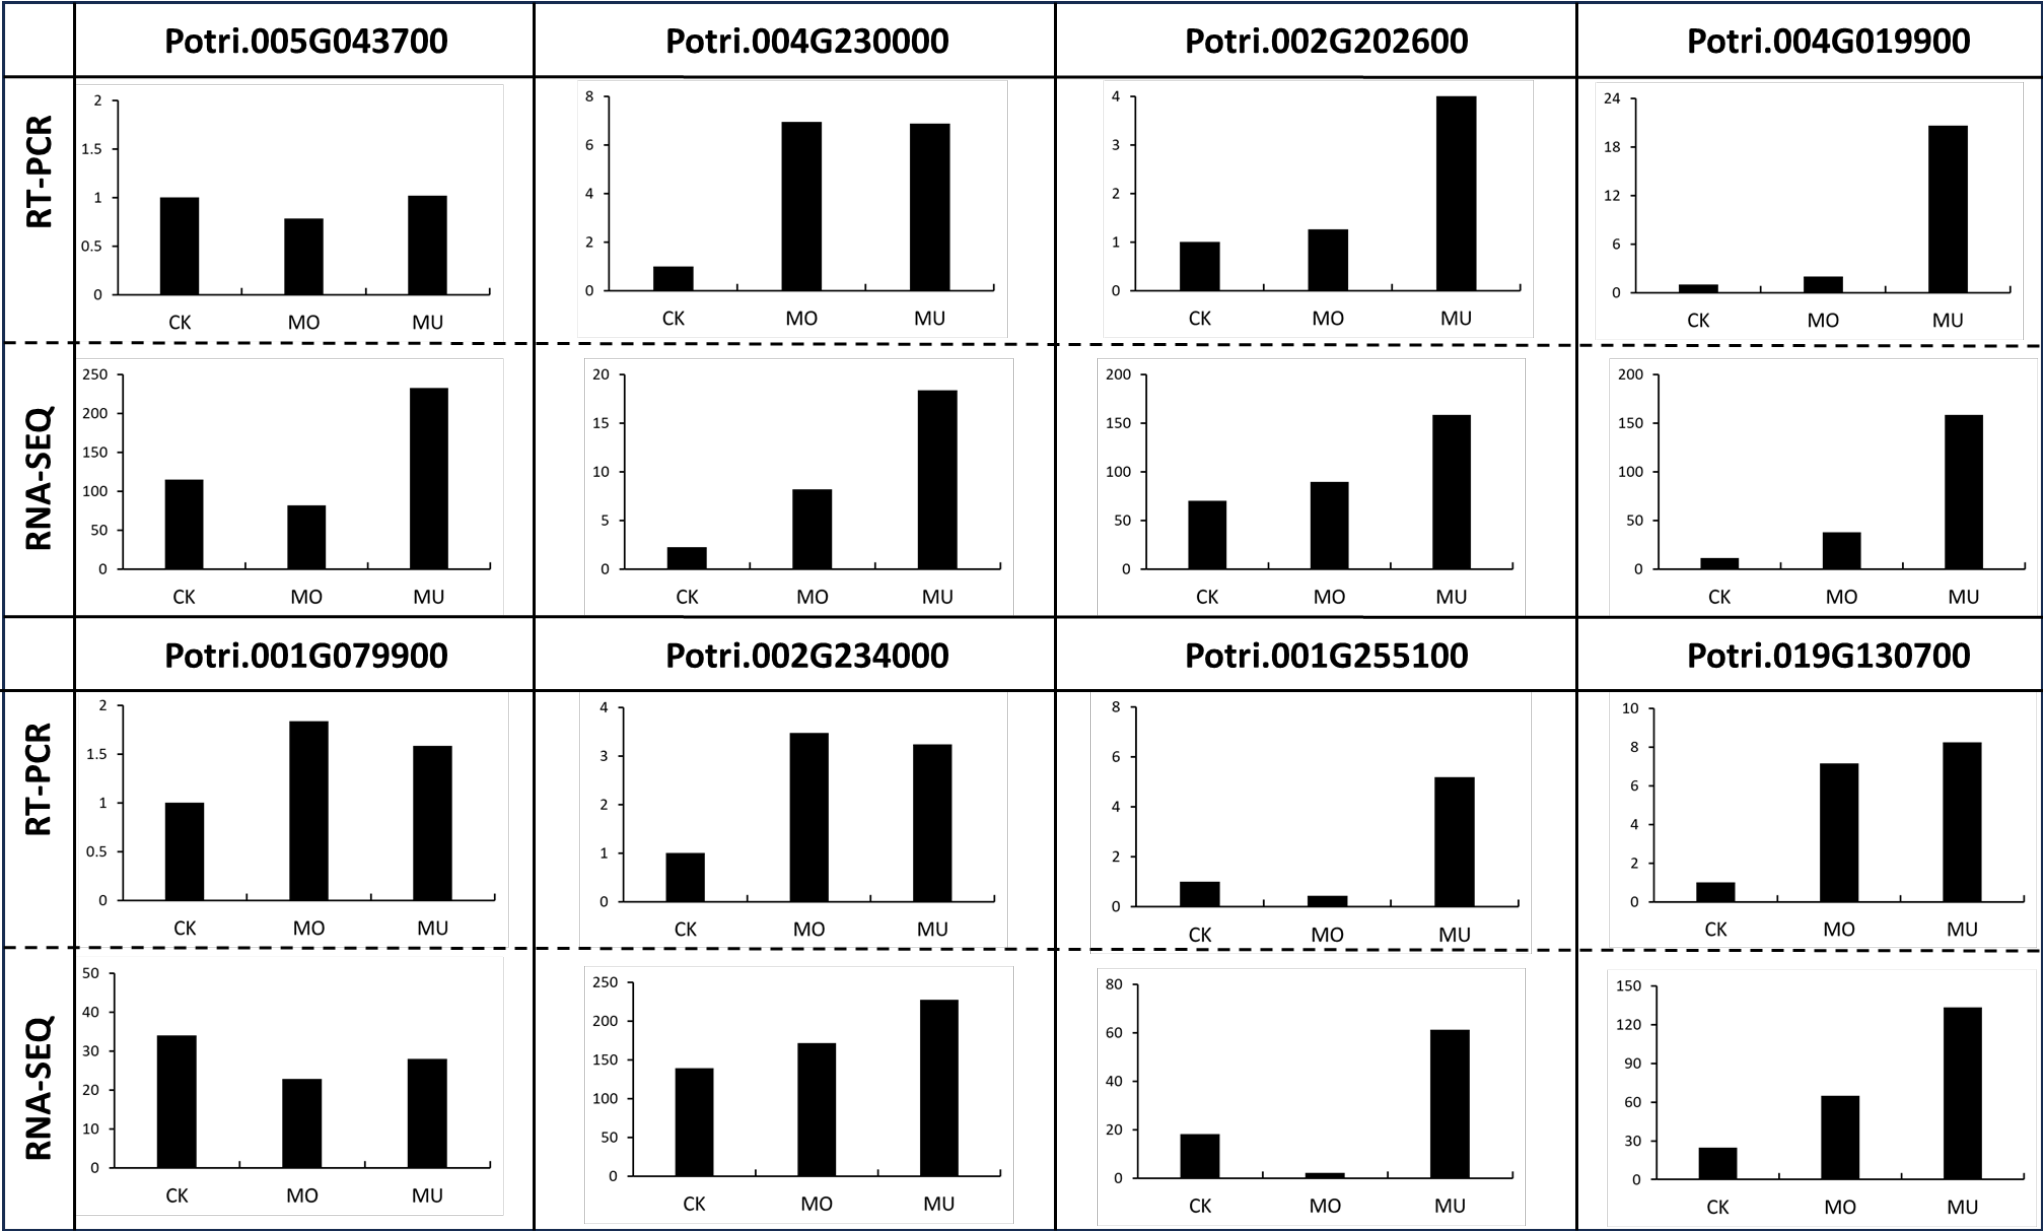

**Supplementary Figure S3.** Annotation and expression profiles of genes involved in plant-pathogen interaction (ko04626) enriched by the DEGs of MU\_treat vs. control.

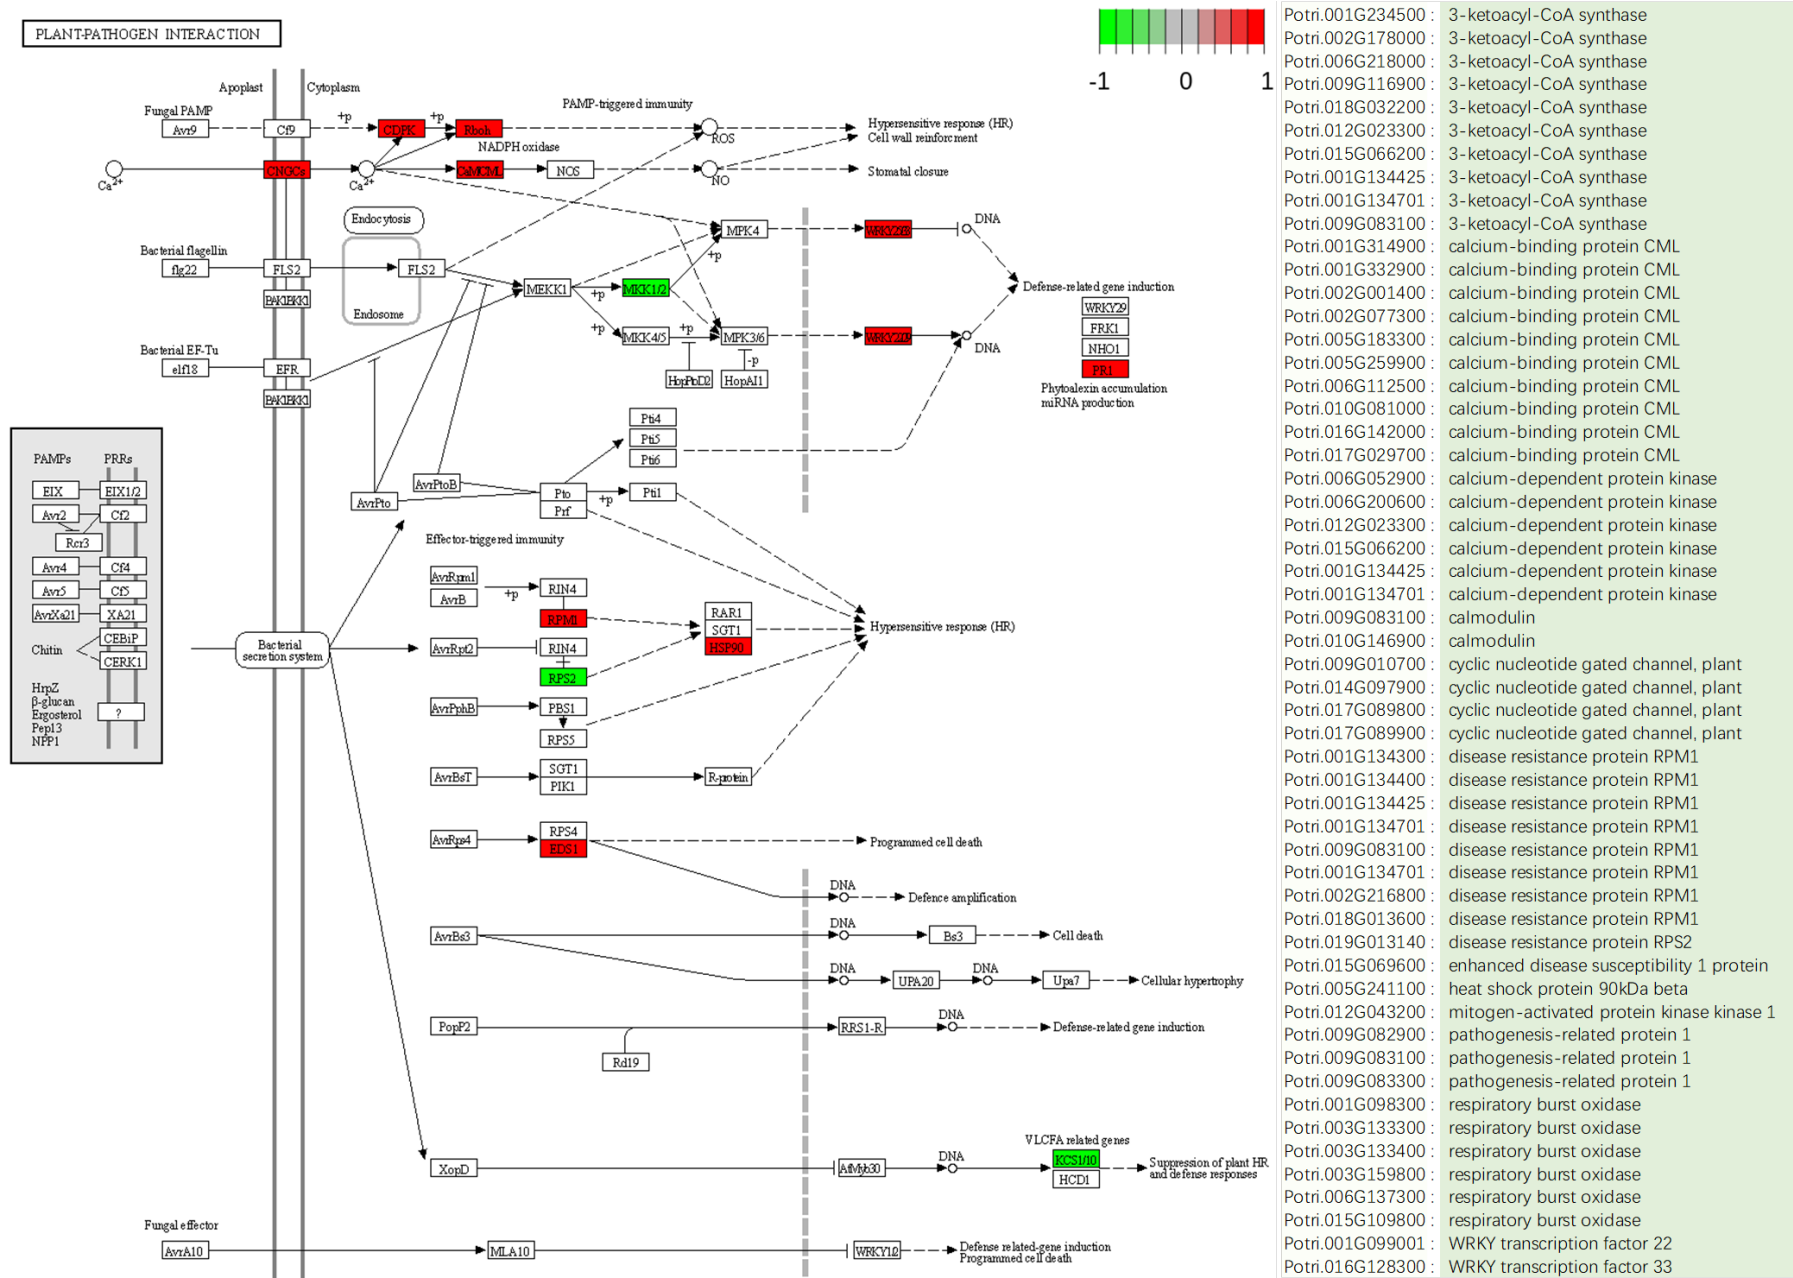

|                  |                                           |
|------------------|-------------------------------------------|
| Potri.001G234500 | 3-ketoacyl-CoA synthase                   |
| Potri.002G178000 | 3-ketoacyl-CoA synthase                   |
| Potri.006G218000 | 3-ketoacyl-CoA synthase                   |
| Potri.009G116900 | 3-ketoacyl-CoA synthase                   |
| Potri.018G032200 | 3-ketoacyl-CoA synthase                   |
| Potri.012G023300 | 3-ketoacyl-CoA synthase                   |
| Potri.015G066200 | 3-ketoacyl-CoA synthase                   |
| Potri.001G134425 | 3-ketoacyl-CoA synthase                   |
| Potri.001G134701 | 3-ketoacyl-CoA synthase                   |
| Potri.009G083100 | 3-ketoacyl-CoA synthase                   |
| Potri.001G314900 | calcium-binding protein CML               |
| Potri.001G332900 | calcium-binding protein CML               |
| Potri.002G001400 | calcium-binding protein CML               |
| Potri.002G077300 | calcium-binding protein CML               |
| Potri.005G183300 | calcium-binding protein CML               |
| Potri.005G259900 | calcium-binding protein CML               |
| Potri.006G112500 | calcium-binding protein CML               |
| Potri.010G081000 | calcium-binding protein CML               |
| Potri.016G142000 | calcium-binding protein CML               |
| Potri.017G029700 | calcium-binding protein CML               |
| Potri.006G052900 | calcium-dependent protein kinase          |
| Potri.006G200600 | calcium-dependent protein kinase          |
| Potri.012G023300 | calcium-dependent protein kinase          |
| Potri.015G066200 | calcium-dependent protein kinase          |
| Potri.001G134425 | calcium-dependent protein kinase          |
| Potri.001G134701 | calcium-dependent protein kinase          |
| Potri.009G083100 | calmodulin                                |
| Potri.010G146900 | calmodulin                                |
| Potri.009G010700 | cyclic nucleotide gated channel, plant    |
| Potri.014G097900 | cyclic nucleotide gated channel, plant    |
| Potri.017G089800 | cyclic nucleotide gated channel, plant    |
| Potri.017G089900 | cyclic nucleotide gated channel, plant    |
| Potri.001G134300 | disease resistance protein RPM1           |
| Potri.001G134400 | disease resistance protein RPM1           |
| Potri.001G134425 | disease resistance protein RPM1           |
| Potri.001G134701 | disease resistance protein RPM1           |
| Potri.009G083100 | disease resistance protein RPM1           |
| Potri.001G134701 | disease resistance protein RPM1           |
| Potri.002G216800 | disease resistance protein RPM1           |
| Potri.018G013600 | disease resistance protein RPM1           |
| Potri.019G013140 | disease resistance protein RPS2           |
| Potri.015G069600 | enhanced disease susceptibility 1 protein |
| Potri.005G241100 | heat shock protein 90kDa beta             |
| Potri.012G043200 | mitogen-activated protein kinase kinase 1 |
| Potri.009G082900 | pathogenesis-related protein 1            |
| Potri.009G083100 | pathogenesis-related protein 1            |
| Potri.009G083300 | pathogenesis-related protein 1            |
| Potri.001G098300 | respiratory burst oxidase                 |
| Potri.003G133300 | respiratory burst oxidase                 |
| Potri.003G133400 | respiratory burst oxidase                 |
| Potri.003G159800 | respiratory burst oxidase                 |
| Potri.006G137300 | respiratory burst oxidase                 |
| Potri.015G109800 | respiratory burst oxidase                 |
| Potri.001G099001 | WRKY transcription factor 22              |
| Potri.016G128300 | WRKY transcription factor 33              |

**Supplementary Figure S4.** The expression level of genes belonged to the module “Peroxidases” in Mapman analysis.

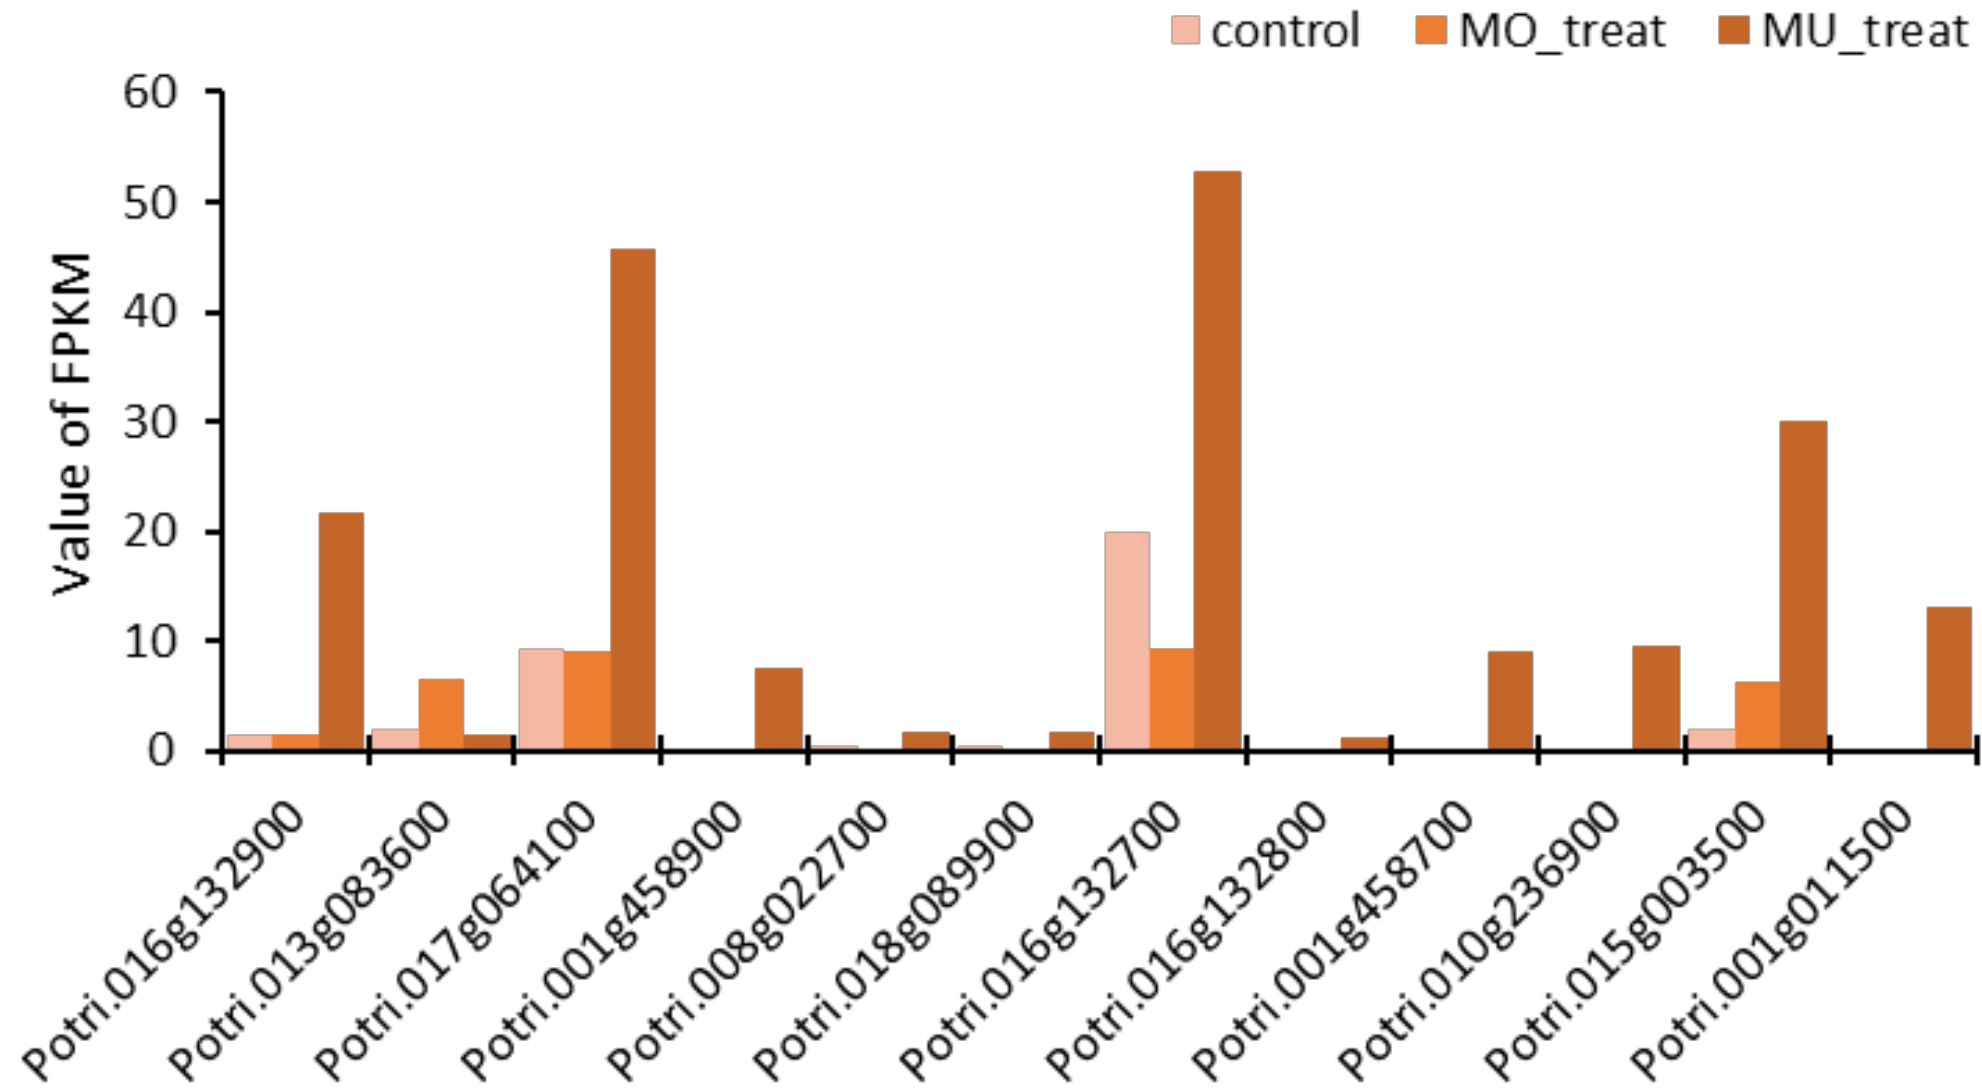

**Supplementary Figure S5.** The enriched GO terms (biological process) analyzed by the DEGs of MO\_treat vs. MU\_treat and NL895-H vs. NL895-W. **(A)** the GO terms enriched by DEGs of NL895-H vs. NL895-W, NL895 is a poplar clone containing high resistance to weak active strain of *Marssonina brunnea* f. sp. *multigermtubi* (W) and showed certain susceptible to high active strain (H) (Chen. C *et al*, 2015. “A comprehensive analysis of the transcriptomes of *Marssonina brunnea* and infected poplar leaves to capture vital events in host-pathogen interactions”). **(B)** the GO terms enriched by DEGs of MO\_treat vs. MU\_treat in this study.

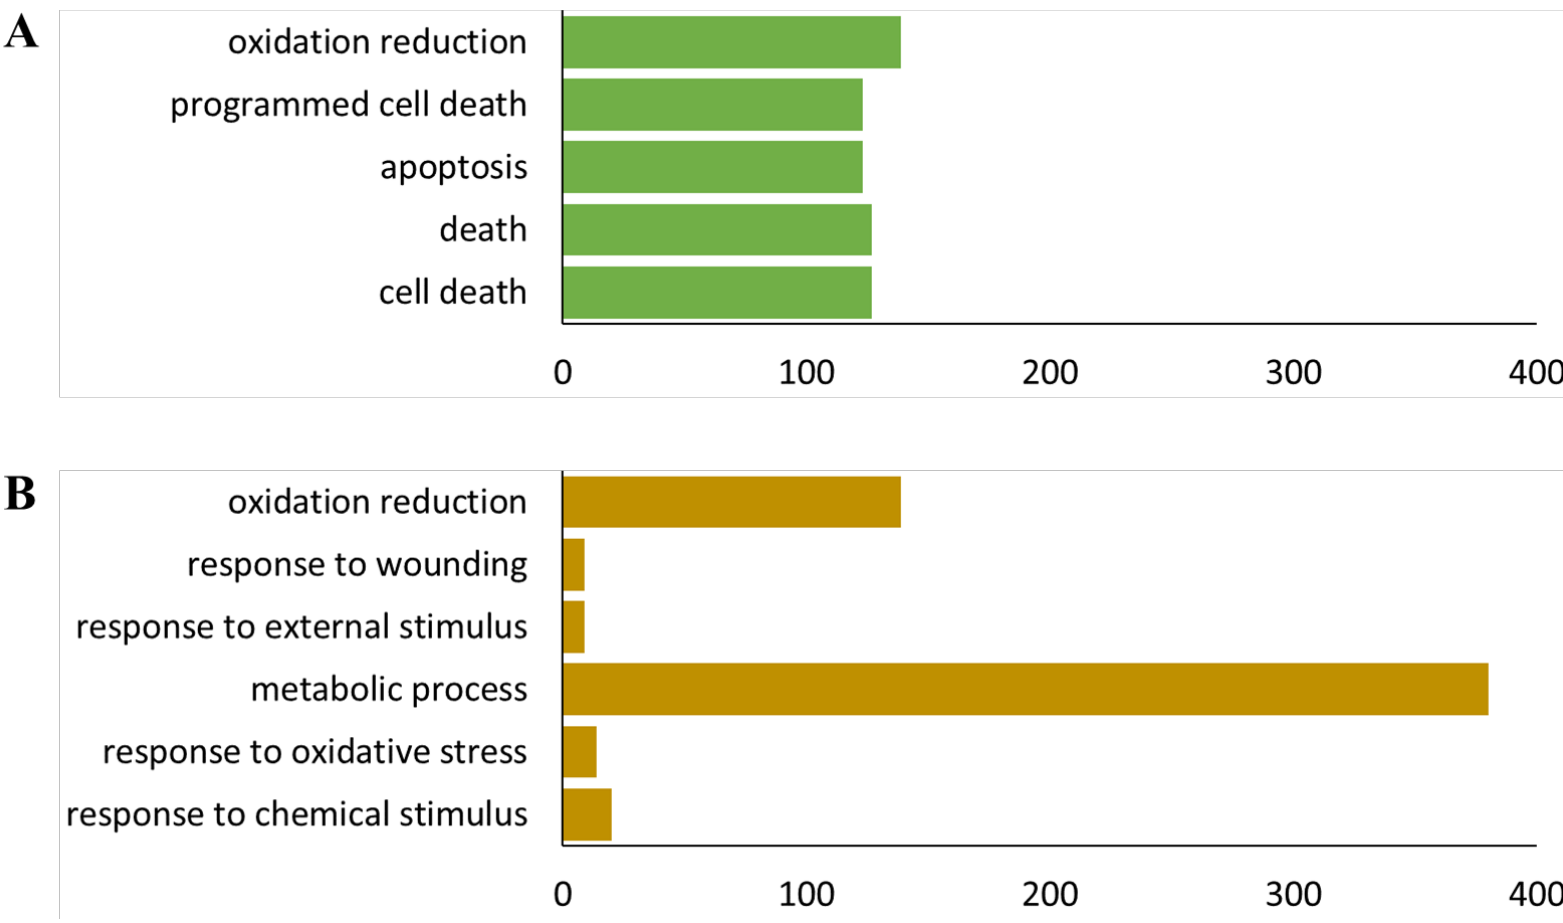

Supplement: s1 [file s1]
