# Supplementary material for: Transcriptome Analysis and Reactive Oxygen Species Detection Suggest Contrasting Molecular Mechanisms in Populus canadensis’ Response to Different Formae Speciales of Marssonina brunnea
Source: Genes (Basel). 2024 Jan 18;15(1):116. doi: 10.3390/genes15010116 (PMC10815367; doi:10.3390/genes15010116)
Supplement: Supplementary file 1 [file genes-15-00116-s001.zip › Supplementary Table S1.xlsx]

## Sheet: Sheet1
Supplementary Table S1. qRT-PCR primers used in this study.
Gene ID	Gene description	Forward primers (5’ → 3’)	Reverse primers (5’ → 3’)	Length of production
Potri.007G093700	60S	AGGTGAACTCTTGATGCTTCGTCTT	CTTCTCTTCCATTGCCTGTCCAACT	177
Potri.004G230000	Disease resistance protein (TIR-NBS-LRR class) family	GCAATCCAAGAATCGCAAAT	ACCCTCTCCATGTCATCCTG	230
Potri.004G023800	CRK10, cysteine-rich RLK (RECEPTOR-like protein kinase) 10	GCCGCAGTTGCTATTTAAGG	TCTTGCATTTTCGCATTCTG	207
Potri.002G202600	Plant invertase/pectin methylesterase inhibitor superfamily	CGGTGATTACTGGGAATCGT	CTTCGAAGAGCTACAGCCTGA	151
Potri.004G019900	GPT2, glucose-6-phosphate/phosphate translocator 2	TCTTGGGCTACAAGGATTGC	AGGCTCGCCACTCTTGATTA	162
Potri.005G043700	Leucine-rich repeat transmembrane protein kinase protein	CGGCAAACACCTCAATTTCT	AGGGAGACATGGATCACCAG	194
Potri.002G234000	NAD(P)-linked oxidoreductase superfamily protein	GCATTGATACCAGCGTTCCT	CAATCCCAATGCCAAGTTCT	225
Potri.001G255100	Glycosyl hydrolase superfamily protein	GCCATTGCTTATCCCACCTA	CATAACAAACCCCGATGGAT	172
Potri.019G130700	C4H, cinnamate-4-hydroxylase	GGCTGCAACTCTTCAAGGAC	GATGGTTCACAAGCTCAGCA	231
