# Supplementary material for: Transcriptome Analysis and Reactive Oxygen Species Detection Suggest Contrasting Molecular Mechanisms in Populus canadensis’ Response to Different Formae Speciales of Marssonina brunnea
Source: Genes (Basel). 2024 Jan 18;15(1):116. doi: 10.3390/genes15010116 (PMC10815367; doi:10.3390/genes15010116)
Supplement: Supplementary file 1 [file genes-15-00116-s001.zip › Supplementary Table S2.xlsx]

## Sheet: Sheet1
Supplementary Table S2. Enriched terms in the GO analyses based on the DEGs of MO_treat vs. control and MU_treat vs. control (P < 0.05).
MO_treat vs. control
ID	Ontology	Description	pvalue	Count	geneID
GO:0048544	biological_process	recognition of pollen	1.17034e-07	39	Potri.016G016500/Potri.002G236400/Potri.002G236500/Potri.001G303700/Potri.016G021100/Potri.016G016800/Potri.014G096000/Potri.007G030400/Potri.016G017100/Potri.016G017232/Potri.014G146000/Potri.014G088400/Potri.006G007200/Potri.017G052166/Potri.016G014300/Potri.016G016700/Potri.016G014401/Potri.017G032766/Potri.016G017002/Potri.007G141900/Potri.017G032733/Potri.017G052300/Potri.001G133000/Potri.01…
GO:0042545	biological_process	cell wall modification	5.91005e-06	21	Potri.010G001200/Potri.007G125450/Potri.007G125600/Potri.007G126100/Potri.009G154600/Potri.007G125000/Potri.001G038300/Potri.009G154100/Potri.007G141450/Potri.007G125800/Potri.006G118500/Potri.010G001100/Potri.017G117065/Potri.017G009500/Potri.002G076100/Potri.002G076000/Potri.001G038525/Potri.001G039450/Potri.009G157201/Potri.017G117285/Potri.015G045200/Potri.001G040500/Potri.019G119900/Potri.00…
GO:0046274	biological_process	lignin catabolic process	7.05461e-06	17	Potri.004G085000/Potri.006G068900/Potri.002G171700/Potri.001G240600/Potri.003G185175/Potri.003G195500/Potri.006G204700/Potri.001G041700/Potri.003G076300/Potri.010G128200/Potri.007G106300/Potri.008G203100/Potri.009G162400/Potri.004G007600/Potri.006G232400/Potri.002G054900/Potri.007G099301/Potri.005G063000/Potri.018G014800/Potri.001G158600/Potri.019G065200/Potri.019G064800/Potri.019G065100/Potri.01…
GO:0051260	biological_process	protein homooligomerization	3.2846e-05	10	Potri.010G001200/Potri.001G226100/Potri.001G225808/Potri.003G159700/Potri.001G071000/Potri.016G138600/Potri.004G159800/Potri.006G071200/Potri.003G038500/Potri.006G109900/Potri.005G059500/Potri.002G093900/Potri.012G017950/Potri.001G255100/Potri.015G024200/Potri.009G153900/Potri.006G188300/Potri.004G038100/Potri.009G006600/Potri.018G094800/Potri.010G001100/Potri.010G049700/Potri.012G049300/Potri.01…
GO:0016036	biological_process	cellular response to phosphate starvation	0.000738642	3	Potri.009G154600/Potri.007G111100/Potri.001G414000/Potri.001G038300/Potri.001G413400/Potri.011G125901/Potri.009G154100/Potri.011G126201/Potri.011G035800/Potri.007G111200/Potri.003G211366/Potri.011G036600/Potri.T085150/Potri.019G007700/Potri.019G011400/Potri.001G038525/Potri.001G039450/Potri.005G014700/Potri.001G414200/Potri.002G125800/Potri.011G039100/Potri.005G014900/Potri.013G149500/Potri.001G0…
GO:0006952	biological_process	defense response	0.00112997	19	Potri.008G067500/Potri.012G090000/Potri.019G057901/Potri.001G118500/Potri.007G115500/Potri.014G021700/Potri.014G020600/Potri.009G064900/Potri.019G130700/Potri.012G089900/Potri.009G065000/Potri.007G018400/Potri.005G117500/Potri.001G334700/Potri.005G143900/Potri.017G099000/Potri.015G138900/Potri.008G026400/Potri.007G026500/Potri.015G006100/Potri.002G175200/Potri.011G130800/Potri.013G125300/Potri.00…
GO:0006629	biological_process	lipid metabolic process	0.00216676	33	Potri.007G111100/Potri.001G414000/Potri.001G413400/Potri.011G125901/Potri.011G126201/Potri.011G035800/Potri.011G128600/Potri.011G036600/Potri.005G014700/Potri.001G414200/Potri.011G039100/Potri.005G014900/Potri.013G149500/Potri.011G036532/Potri.001G409300/Potri.019G119900/Potri.011G036100/Potri.013G086100/Potri.011G125000/Potri.013G115800/Potri.019G007600/Potri.013G059900/Potri.010G017800/Potri.01…
GO:0007018	biological_process	microtubule-based movement	0.00260666	19	Potri.003G159700/Potri.001G071000/Potri.006G071200/Potri.015G040700/Potri.010G193100/Potri.015G040600/Potri.009G006600/Potri.007G023300/Potri.018G094800/Potri.011G120300/Potri.001G401300/Potri.011G120200/Potri.014G100600/Potri.016G112100/Potri.014G146100/Potri.004G021000/Potri.014G100650/Potri.007G008500/Potri.006G087500/Potri.004G156400/Potri.008G064000/Potri.015G040400/Potri.002G060500/Potri.00…
GO:0010411	biological_process	xyloglucan metabolic process	0.00263798	11	Potri.003G159700/Potri.001G071000/Potri.006G071200/Potri.001G162400/Potri.012G014500/Potri.014G149700/Potri.001G162600/Potri.001G162500/Potri.002G202500/Potri.006G256600/Potri.009G006600/Potri.018G051400/Potri.018G094800/Potri.014G146100/Potri.004G021000/Potri.007G107300/Potri.003G002800/Potri.003G002650/Potri.007G008500/Potri.016G017700/Potri.015G013700/Potri.015G127800/Potri.002G060500/Potri.00…
GO:0009607	biological_process	response to biotic stimulus	0.00356069	10	Potri.015G128200/Potri.014G129400/Potri.012G127500/Potri.001G162400/Potri.012G014500/Potri.014G149700/Potri.001G162600/Potri.001G162500/Potri.002G202500/Potri.006G256600/Potri.015G128400/Potri.018G051400/Potri.007G107300/Potri.003G002800/Potri.003G002650/Potri.015G013700/Potri.015G128300/Potri.014G044100/Potri.015G127800/Potri.003G113600/Potri.003G113700/Potri.006G256700/Potri.011G135000/Potri.00…
GO:0006073	biological_process	cellular glucan metabolic process	0.00373274	11	Potri.002G227701/Potri.001G118300/Potri.015G040700/Potri.010G193100/Potri.001G118200/Potri.015G040600/Potri.007G023300/Potri.005G247700/Potri.011G120300/Potri.007G088222/Potri.001G401300/Potri.011G120200/Potri.014G100600/Potri.016G112100/Potri.014G100650/Potri.006G087500/Potri.004G156400/Potri.008G064000/Potri.004G180500/Potri.015G040400/Potri.007G038300/Potri.010G089200/Potri.003G125600/Potri.01…
GO:0009772	biological_process	photosynthetic electron transport in photosystem II	0.00388083	6	Potri.008G067500/Potri.012G090000/Potri.019G057901/Potri.001G118500/Potri.007G115500/Potri.014G021700/Potri.014G020600/Potri.009G064900/Potri.019G130700/Potri.012G089900/Potri.009G065000/Potri.007G018400/Potri.005G117500/Potri.001G334700/Potri.005G143900/Potri.017G099000/Potri.015G138900/Potri.008G026400/Potri.007G026500/Potri.015G006100/Potri.002G175200/Potri.011G130800/Potri.013G125300/Potri.00…
GO:0009733	biological_process	response to auxin	0.00534161	17	Potri.001G162400/Potri.012G014500/Potri.014G149700/Potri.001G162600/Potri.001G162500/Potri.002G202500/Potri.006G256600/Potri.018G051400/Potri.007G107300/Potri.003G002800/Potri.003G002650/Potri.016G017700/Potri.015G013700/Potri.015G127800/Potri.006G256700/Potri.011G135000/Potri.018G068400/Potri.013G013200/Potri.008G011100/Potri.006G135100/Potri.010G109400
GO:0042546	biological_process	cell wall biogenesis	0.00808224	11	Potri.001G162400/Potri.012G014500/Potri.014G149700/Potri.001G162600/Potri.001G162500/Potri.002G202500/Potri.006G256600/Potri.018G051400/Potri.007G107300/Potri.003G002800/Potri.003G002650/Potri.016G017700/Potri.015G013700/Potri.015G127800/Potri.006G256700/Potri.011G135000/Potri.018G068400/Potri.013G013200/Potri.008G011100/Potri.006G135100/Potri.010G109400
GO:0009664	biological_process	plant-type cell wall organization	0.00828431	10	Potri.015G040700/Potri.010G193100/Potri.015G040600/Potri.007G023300/Potri.011G120300/Potri.001G401300/Potri.011G120200/Potri.014G100600/Potri.016G112100/Potri.014G100650/Potri.006G087500/Potri.004G156400/Potri.008G064000/Potri.015G040400/Potri.008G073700/Potri.008G073800/Potri.001G248700
GO:0005985	biological_process	sucrose metabolic process	0.0112539	5	Potri.015G040700/Potri.010G193100/Potri.015G040600/Potri.007G023300/Potri.011G120300/Potri.001G401300/Potri.011G120200/Potri.014G100600/Potri.016G112100/Potri.014G100650/Potri.006G087500/Potri.004G156400/Potri.008G064000/Potri.015G040400/Potri.008G073700/Potri.008G073800/Potri.001G248700
GO:0042742	biological_process	defense response to bacterium	0.0119819	3	Potri.005G038350/Potri.005G038301/Potri.005G038250/Potri.001G049501/Potri.001G021200/Potri.010G230366/Potri.001G141801/Potri.010G230433/Potri.010G146200/Potri.001G021300
GO:0050832	biological_process	defense response to fungus	0.0119819	3	Potri.006G121700/Potri.015G063500/Potri.009G128500/Potri.015G063400/Potri.009G136600/Potri.001G068600/Potri.017G076800/Potri.010G034700/Potri.001G185700/Potri.001G258600/Potri.016G113300/Potri.015G072600/Potri.005G109300/Potri.004G176300/Potri.018G041600/Potri.006G013900/Potri.019G079600/Potri.004G058800/Potri.001G158700/Potri.005G109200/Potri.004G157600/Potri.004G019900/Potri.001G461400/Potri.00…
GO:0009308	biological_process	amine metabolic process	0.0130971	4	Potri.010G189300/Potri.001G191400/Potri.019G024700/Potri.018G063901/Potri.004G064500/Potri.019G008300/Potri.013G153000/Potri.018G089400/Potri.019G024800/Potri.018G089200/Potri.013G102400/Potri.001G332300/Potri.009G070000/Potri.003G213700/Potri.004G054400/Potri.019G024400/Potri.009G069900/Potri.010G137100/Potri.014G160100/Potri.006G166701/Potri.015G089700/Potri.006G166800/Potri.011G063900/Potri.00…
GO:0006537	biological_process	glutamate biosynthetic process	0.0195687	3	Potri.001G234500/Potri.009G026800/Potri.006G218000/Potri.003G183900/Potri.001G448000/Potri.010G125300/Potri.005G047000/Potri.004G017600/Potri.010G180000/Potri.006G010300/Potri.013G119600/Potri.010G056300/Potri.018G104700/Potri.016G112400/Potri.003G082100/Potri.014G113600/Potri.011G146000/Potri.013G039700/Potri.010G192400/Potri.004G096425/Potri.015G147300/Potri.008G065000/Potri.009G116900/Potri.00…
GO:0030244	biological_process	cellulose biosynthetic process	0.021434	6	Potri.014G113000/Potri.002G187500/Potri.001G139600/Potri.017G074000/Potri.002G019600/Potri.001G362300/Potri.017G081100/Potri.015G023800/Potri.002G187400/Potri.003G094400/Potri.016G122901/Potri.001G139700/Potri.001G095600/Potri.003G034700/Potri.003G198401/Potri.T125806/Potri.010G055200/Potri.001G362200
GO:0019684	biological_process	photosynthesis, light reaction	0.0257902	6	Potri.014G061400/Potri.002G143900/Potri.001G135950
GO:0015977	biological_process	carbon fixation	0.031928	4	Potri.004G020000/Potri.010G111000/Potri.004G051500/Potri.008G131300/Potri.008G212300/Potri.003G002500/Potri.009G011900/Potri.008G213100/Potri.005G111400/Potri.017G000800/Potri.016G046500/Potri.006G129700/Potri.004G033000/Potri.017G051100/Potri.011G025966/Potri.010G220600/Potri.017G000900/Potri.002G006700/Potri.016G088000
GO:0070588	biological_process	calcium ion transmembrane transport	0.0359391	5	Potri.004G179100/Potri.009G139400/Potri.008G078800/Potri.010G249600/Potri.004G179514/Potri.010G043300/Potri.003G201700/Potri.006G106900/Potri.005G185600/Potri.008G195700/Potri.012G102200/Potri.002G070101/Potri.008G020700/Potri.008G009500/Potri.005G246400/Potri.008G052900/Potri.002G074850/Potri.014G006700
GO:0007017	biological_process	microtubule-based process	0.0376348	10	Potri.019G057500/Potri.010G167200/Potri.004G123200/Potri.008G057100/Potri.016G135200/Potri.007G088222/Potri.006G108000/Potri.001G028750/Potri.009G019200/Potri.013G060800/Potri.004G188200/Potri.009G031800/Potri.009G148900/Potri.001G001100/Potri.004G181700/Potri.007G088358/Potri.014G007000
GO:0044238	biological_process	primary metabolic process	0.040502	4	Potri.014G126000/Potri.001G416300/Potri.002G201000/Potri.005G117000/Potri.014G125700/Potri.006G039200/Potri.001G360200/Potri.012G129600/Potri.003G173300/Potri.002G110600/Potri.011G031200/Potri.002G106000/Potri.009G026000/Potri.013G011500/Potri.013G020700/Potri.006G085300/Potri.002G027600/Potri.004G193700/Potri.003G127900/Potri.006G082900/Potri.002G235500/Potri.004G031600/Potri.003G192400
GO:0046168	biological_process	glycerol-3-phosphate catabolic process	0.0433372	2	Potri.014G126000/Potri.001G416300/Potri.002G201000/Potri.005G117000/Potri.014G125700/Potri.001G360200/Potri.002G110600/Potri.011G031200/Potri.002G106000/Potri.009G026000/Potri.013G011500/Potri.013G020700/Potri.006G085300/Potri.002G027600/Potri.004G193700/Potri.003G127900/Potri.006G082900/Potri.002G235500/Potri.004G031600
GO:0051258	biological_process	protein polymerization	0.046639	8	Potri.014G033600/Potri.014G033200/Potri.014G033900/Potri.017G063500/Potri.004G172000/Potri.002G128300/Potri.014G091800/Potri.001G012401/Potri.001G332300/Potri.005G068700/Potri.001G161500/Potri.004G007600/Potri.006G192000/Potri.002G128000/Potri.009G131600/Potri.009G046600/Potri.011G064400/Potri.014G027400/Potri.005G138800/Potri.014G033550/Potri.004G140200/Potri.009G057900/Potri.014G027500/Potri.00…
GO:0048046	cellular_component	apoplast	1.53749e-07	28	Potri.014G126000/Potri.001G416300/Potri.002G201000/Potri.005G117000/Potri.014G125700/Potri.001G360200/Potri.002G110600/Potri.011G031200/Potri.002G106000/Potri.009G026000/Potri.013G011500/Potri.013G020700/Potri.006G085300/Potri.002G027600/Potri.004G193700/Potri.003G127900/Potri.006G082900/Potri.002G235500/Potri.004G031600
GO:0005618	cellular_component	cell wall	1.80857e-07	32	Potri.014G126000/Potri.001G416300/Potri.002G201000/Potri.005G117000/Potri.014G125700/Potri.001G360200/Potri.002G110600/Potri.011G031200/Potri.002G106000/Potri.009G026000/Potri.013G011500/Potri.013G020700/Potri.006G085300/Potri.002G027600/Potri.004G193700/Potri.003G127900/Potri.006G082900/Potri.002G235500/Potri.004G031600
GO:0005576	cellular_component	extracellular region	0.00184003	17	Potri.003G159700/Potri.001G071000/Potri.006G071200/Potri.009G006600/Potri.018G094800/Potri.014G146100/Potri.004G021000/Potri.007G008500/Potri.002G060500/Potri.013G152400/Potri.014G115000
GO:0005871	cellular_component	kinesin complex	0.00184598	19	Potri.004G044700/Potri.018G081300/Potri.016G015550/Potri.002G231250/Potri.005G060700/Potri.009G098601
GO:0005874	cellular_component	microtubule	0.00963615	10	Potri.001G015500/Potri.005G032700/Potri.013G022000/Potri.017G046200/Potri.001G015601/Potri.001G167700/Potri.001G015400/Potri.005G032400/Potri.001G015300/Potri.005G032600
GO:0016758	molecular_function	hexosyltransferase activity	2.43977e-13	64	Potri.003G138700/Potri.010G093400/Potri.007G016600/Potri.018G053600/Potri.001G093100/Potri.004G203400/Potri.008G148200/Potri.002G142800/Potri.003G111900/Potri.017G066860/Potri.001G092900/Potri.003G182200/Potri.002G124800/Potri.001G020200/Potri.009G164300/Potri.018G019700/Potri.013G040700/Potri.005G053200/Potri.005G082000/Potri.006G049200/Potri.016G137900/Potri.001G155100/Potri.006G133200/Potri.01…
GO:0030247	molecular_function	polysaccharide binding	3.95672e-11	38	Potri.004G020000/Potri.010G111000/Potri.004G051500/Potri.008G131300/Potri.008G212300/Potri.008G213100/Potri.016G046500/Potri.004G033000/Potri.017G051100/Potri.011G025966
GO:0004190	molecular_function	aspartic-type endopeptidase activity	1.96703e-09	32	Potri.003G159700/Potri.001G071000/Potri.006G071200/Potri.009G006600/Potri.018G094800/Potri.014G146100/Potri.004G021000/Potri.007G008500/Potri.002G060500/Potri.013G152400/Potri.014G115000
GO:0004553	molecular_function	hydrolase activity, hydrolyzing O-glycosyl compounds	1.65177e-08	77	Potri.003G159700/Potri.001G071000/Potri.006G071200/Potri.009G006600/Potri.018G094800/Potri.014G146100/Potri.004G021000/Potri.007G008500/Potri.002G060500/Potri.013G152400/Potri.014G115000
GO:0004674	molecular_function	protein serine/threonine kinase activity	2.08357e-08	49	Potri.013G138300/Potri.005G154836/Potri.013G142760/Potri.011G074868/Potri.019G047540/Potri.002G006700
GO:0004497	molecular_function	monooxygenase activity	2.48716e-08	65	Potri.003G156500/Potri.008G081000/Potri.001G074700/Potri.010G175300/Potri.014G041700
GO:0004857	molecular_function	enzyme inhibitor activity	1.03443e-06	29	Potri.013G041700/Potri.019G093900/Potri.013G041600/Potri.019G093800/Potri.013G041900/Potri.019G094100
GO:0005507	molecular_function	copper ion binding	2.0893e-06	29	Potri.009G140900/Potri.017G043600/Potri.009G141150/Potri.004G165450/Potri.004G181400/Potri.009G126500/Potri.005G237200/Potri.004G164700/Potri.009G126000/Potri.006G137000/Potri.009G126400/Potri.004G164400/Potri.009G141201/Potri.007G067800/Potri.005G096400/Potri.009G127600/Potri.008G037900
GO:0016705	molecular_function	oxidoreductase activity, acting on paired donors, with incorporation or reduction of molecular oxygen	2.54995e-06	70	Potri.001G075600/Potri.015G109200/Potri.009G154600/Potri.002G014300/Potri.015G071500/Potri.005G075900/Potri.015G066200/Potri.003G061700/Potri.009G154100/Potri.013G033200/Potri.002G075901/Potri.006G070400/Potri.008G103900/Potri.006G137300/Potri.002G076100/Potri.002G076000/Potri.009G157201/Potri.002G017200/Potri.006G253900/Potri.015G013200/Potri.001G040500/Potri.017G029700/Potri.019G026780/Potri.01…
GO:0030599	molecular_function	pectinesterase activity	5.91005e-06	21	Potri.001G118300/Potri.001G118200/Potri.013G163100/Potri.010G089200/Potri.010G088900
GO:0052716	molecular_function	hydroquinone:oxygen oxidoreductase activity	7.05461e-06	17	Potri.008G114200/Potri.002G214100/Potri.010G131800
GO:0005215	molecular_function	transporter activity	7.75457e-05	45	Potri.003G159700/Potri.001G071000/Potri.006G071200/Potri.009G006600/Potri.018G094800/Potri.014G146100/Potri.004G021000/Potri.007G008500/Potri.002G060500/Potri.013G152400/Potri.014G115000
GO:0016788	molecular_function	hydrolase activity, acting on ester bonds	0.000270314	32	Potri.019G057500/Potri.010G167200/Potri.004G123200/Potri.008G057100/Potri.016G135200/Potri.006G108000/Potri.013G060800/Potri.009G031800/Potri.002G231250/Potri.001G001100
GO:0016747	molecular_function	acyltransferase activity, transferring groups other than amino-acyl groups	0.000445832	38	Potri.012G002500/Potri.008G027100/Potri.013G060400/Potri.001G145300/Potri.005G216900/Potri.009G084700
GO:0042626	molecular_function	ATPase-coupled transmembrane transporter activity	0.000509764	18	Potri.013G138300/Potri.005G154836/Potri.013G142760/Potri.011G074868/Potri.019G047540/Potri.002G006700
GO:0016597	molecular_function	amino acid binding	0.00135139	18	Potri.001G118300/Potri.001G118200/Potri.010G089200/Potri.010G088900
GO:0008017	molecular_function	microtubule binding	0.00184534	23	Potri.012G011800/Potri.012G012000/Potri.015G111000/Potri.012G011700
GO:0003777	molecular_function	microtubule motor activity	0.00260666	19	Potri.003G126800/Potri.002G111900/Potri.001G104600/Potri.017G081000/Potri.001G289500/Potri.003G125400/Potri.009G040200/Potri.014G095000/Potri.004G118700/Potri.017G013100
GO:0005199	molecular_function	structural constituent of cell wall	0.00279928	6	Potri.015G029200/Potri.012G037200/Potri.017G139100/Potri.015G029100/Potri.002G202300
GO:0016702	molecular_function	oxidoreductase activity, acting on single donors with incorporation of molecular oxygen, incorporation of two atoms of oxygen	0.00294782	10	Potri.015G029200/Potri.012G037200/Potri.017G139100/Potri.015G029100/Potri.002G202300
GO:0043565	molecular_function	sequence-specific DNA binding	0.00339501	51	Potri.010G074800/Potri.003G142201/Potri.003G142301/Potri.010G074700/Potri.006G004166
GO:0016762	molecular_function	xyloglucan:xyloglucosyl transferase activity	0.00373274	11	Potri.003G126800/Potri.002G111900/Potri.001G104600/Potri.017G081000/Potri.001G071400/Potri.001G289500/Potri.003G125400/Potri.009G040200/Potri.014G095000
GO:0008725	molecular_function	DNA-3-methyladenine glycosylase activity	0.00417009	5	Potri.013G041700/Potri.013G041600/Potri.013G041900
GO:0008061	molecular_function	chitin binding	0.00524317	6	Potri.013G041700/Potri.013G041600/Potri.013G041900
GO:0005509	molecular_function	calcium ion binding	0.00580287	53	Potri.001G118300/Potri.001G118200/Potri.010G089200/Potri.010G088900
GO:0048038	molecular_function	quinone binding	0.00600836	5	Potri.014G113000/Potri.015G063500/Potri.016G056600/Potri.017G084000/Potri.015G063400/Potri.001G048900/Potri.002G187500/Potri.001G139600/Potri.017G074000/Potri.002G019600/Potri.001G362300/Potri.017G081100/Potri.015G023800/Potri.002G187400/Potri.009G008300/Potri.003G094400/Potri.016G122901/Potri.001G139700/Potri.006G199500/Potri.018G074500/Potri.001G095600/Potri.003G034700/Potri.003G198401/Potri.00…
GO:0008964	molecular_function	phosphoenolpyruvate carboxylase activity	0.00642178	3	Potri.012G002500/Potri.008G027100/Potri.013G060400/Potri.001G145300/Potri.005G216900/Potri.009G084700
GO:0004743	molecular_function	pyruvate kinase activity	0.0089654	6	Potri.013G138300/Potri.005G154836/Potri.008G144800/Potri.011G135400/Potri.018G018200/Potri.001G332200/Potri.010G021800/Potri.008G214800/Potri.011G113784/Potri.011G074750/Potri.016G079400/Potri.006G264600/Potri.002G156100/Potri.009G136200/Potri.001G419200/Potri.001G273000/Potri.009G153600/Potri.014G134300/Potri.010G087300/Potri.002G208500/Potri.011G117800/Potri.010G089900/Potri.004G049800/Potri.00…
GO:0045156	molecular_function	electron transporter, transferring electrons within the cyclic electron transport pathway of photosynthesis activity	0.0089654	6	Potri.012G011800/Potri.012G012000/Potri.012G011700
GO:0008131	molecular_function	primary amine oxidase activity	0.00896943	4	Potri.012G011800/Potri.012G012000/Potri.012G011700
GO:0016639	molecular_function	oxidoreductase activity, acting on the CH-NH2 group of donors, NAD or NADP as acceptor	0.00896943	4	Potri.010G074800/Potri.003G142201/Potri.003G142301/Potri.010G074700/Potri.006G004166/Potri.017G099100
GO:0016157	molecular_function	sucrose synthase activity	0.0112539	5	Potri.013G057900/Potri.001G293400
GO:0016760	molecular_function	cellulose synthase (UDP-forming) activity	0.0112539	5	Potri.010G050300/Potri.010G050701
GO:0005200	molecular_function	structural constituent of cytoskeleton	0.0114255	9	Potri.011G113784/Potri.011G074750
GO:0016887	molecular_function	ATP hydrolysis activity	0.0151402	34	Potri.004G134800/Potri.007G122100/Potri.005G108900/Potri.006G137300/Potri.006G129900/Potri.014G143200/Potri.004G015300/Potri.013G156500/Potri.005G112200/Potri.002G018000/Potri.016G132700/Potri.008G022248/Potri.015G003500/Potri.008G022232/Potri.006G069600/Potri.003G133400/Potri.018G136900/Potri.007G019300/Potri.T045500/Potri.013G083600/Potri.008G106400
GO:0030955	molecular_function	potassium ion binding	0.0176031	6	Potri.013G138300/Potri.005G154836/Potri.013G142760/Potri.011G074868/Potri.019G047540/Potri.002G006700
GO:0009055	molecular_function	electron transfer activity	0.0193972	29	Potri.001G457000/Potri.016G043400/Potri.001G320000/Potri.010G249600/Potri.001G122600/Potri.017G059100/Potri.008G094300/Potri.004G105000/Potri.003G181800/Potri.006G046900/Potri.013G079500/Potri.017G101900/Potri.008G009500/Potri.013G104200/Potri.009G169900/Potri.003G181600/Potri.002G141700
GO:0015930	molecular_function	glutamate synthase activity	0.0195687	3	Potri.008G114200/Potri.002G214100/Potri.T124301/Potri.010G131800
GO:0004020	molecular_function	adenylylsulfate kinase activity	0.0230458	2	Potri.005G215600/Potri.008G159200/Potri.010G081100/Potri.013G040201/Potri.005G052700
GO:0008759	molecular_function	UDP-3-O-[3-hydroxymyristoyl] N-acetylglucosamine deacetylase activity	0.0230458	2	Potri.003G126800/Potri.002G111900/Potri.001G104600/Potri.017G081000/Potri.001G289500/Potri.003G125400/Potri.011G126400/Potri.003G052900/Potri.009G040200/Potri.014G095000
GO:0045158	molecular_function	electron transporter, transferring electrons within cytochrome b6/f complex of photosystem II activity	0.0230458	2	Potri.016G024500/Potri.006G026500/Potri.017G053000/Potri.012G112700
GO:0004601	molecular_function	peroxidase activity	0.0240668	21	Potri.005G248950/Potri.005G248975/Potri.015G002200/Potri.005G249000
GO:0016616	molecular_function	oxidoreductase activity, acting on the CH-OH group of donors, NAD or NADP as acceptor	0.0274235	17	Potri.009G045800/Potri.001G251200/Potri.006G099900
GO:0004197	molecular_function	cysteine-type endopeptidase activity	0.040502	4	Potri.005G038100/Potri.005G038200
GO:0015369	molecular_function	calcium:proton antiporter activity	0.0409494	3	Potri.006G070400/Potri.018G132100
GO:0004363	molecular_function	glutathione synthase activity	0.0433372	2	Potri.018G096063/Potri.018G096070
GO:0004623	molecular_function	phospholipase A2 activity	0.0433372	2	Potri.016G043400/Potri.006G046900
GO:0009045	molecular_function	xylose isomerase activity	0.0433372	2	Potri.003G126800/Potri.002G111900/Potri.001G104600/Potri.017G081000/Potri.001G289500/Potri.003G125400/Potri.009G040200/Potri.014G095000
MU_treat vs. control
ID	Ontology	Description	pvalue	Count	geneID
GO:0009765	biological_process	photosynthesis, light harvesting	5.87326e-16	21	Potri.010G221100/Potri.011G079500/Potri.002G221400/Potri.001G407100/Potri.006G099500/Potri.001G210000/Potri.008G067300/Potri.015G062200/Potri.014G165100/Potri.019G063101/Potri.006G139600/Potri.003G171500/Potri.008G041000/Potri.014G172400/Potri.011G126700/Potri.014G029700/Potri.005G239300/Potri.005G239200/Potri.002G189300/Potri.003G020400/Potri.001G056700
GO:0015979	biological_process	photosynthesis	5.10837e-11	45	Potri.007G084700/Potri.019G130700/Potri.011G130800/Potri.011G117600/Potri.007G016400/Potri.005G143900/Potri.008G067500/Potri.005G144000/Potri.007G115500/Potri.009G064900/Potri.011G101500/Potri.011G099200/Potri.013G157900/Potri.014G037600/Potri.011G101700/Potri.014G037900/Potri.009G065000/Potri.014G021700/Potri.007G085000/Potri.019G057901/Potri.007G026500/Potri.012G090000/Potri.011G101250/Potri.00…
GO:0048544	biological_process	recognition of pollen	7.99829e-09	50	Potri.009G154600/Potri.001G038300/Potri.011G039100/Potri.001G038525/Potri.001G134900/Potri.001G039450/Potri.011G125901/Potri.001G413400/Potri.003G211366/Potri.011G125000/Potri.001G040500/Potri.009G154100/Potri.011G125401/Potri.007G111100/Potri.001G411700/Potri.011G036100/Potri.011G038800/Potri.011G039200/Potri.005G014900/Potri.013G059900/Potri.004G192900/Potri.011G037300/Potri.001G414000/Potri.01…
GO:0006979	biological_process	response to oxidative stress	4.13978e-07	42	Potri.009G154600/Potri.001G038300/Potri.014G125300/Potri.007G125450/Potri.007G125600/Potri.001G038525/Potri.017G118100/Potri.001G039450/Potri.010G001200/Potri.007G125000/Potri.001G040500/Potri.009G154100/Potri.017G117340/Potri.002G076000/Potri.007G125800/Potri.007G126100/Potri.017G118250/Potri.004G192900/Potri.001G040628/Potri.004G192700/Potri.017G009500/Potri.002G076100/Potri.009G157201/Potri.01…
GO:0046274	biological_process	lignin catabolic process	4.24164e-07	22	Potri.005G130400/Potri.004G031500/Potri.009G062500/Potri.001G438800/Potri.006G034300/Potri.001G438700/Potri.005G206700/Potri.011G031300/Potri.002G055700/Potri.010G210200/Potri.007G033700/Potri.005G010700/Potri.011G142200/Potri.001G416400/Potri.005G256600/Potri.010G210000/Potri.010G166800/Potri.011G142501/Potri.005G027100/Potri.007G100800
GO:0009607	biological_process	response to biotic stimulus	0.000328897	14	Potri.005G130400/Potri.018G027600/Potri.004G031500/Potri.010G089400/Potri.003G052500/Potri.009G062500/Potri.010G052000/Potri.002G253800/Potri.001G438800/Potri.014G175600/Potri.006G034300/Potri.001G081500/Potri.005G218800/Potri.001G438700/Potri.011G101200/Potri.006G027300/Potri.005G206700/Potri.016G025000/Potri.011G031300/Potri.006G254200/Potri.008G181900/Potri.002G055700/Potri.007G105900/Potri.01…
GO:0051260	biological_process	protein homooligomerization	0.000448428	10	Potri.001G075600/Potri.005G015100/Potri.T121200/Potri.009G154600/Potri.015G109200/Potri.015G066200/Potri.003G061700/Potri.005G130400/Potri.013G009500/Potri.004G034100/Potri.004G031500/Potri.012G111100/Potri.009G062500/Potri.014G029400/Potri.005G052800/Potri.006G034300/Potri.001G040500/Potri.005G215700/Potri.002G075901/Potri.009G154100/Potri.017G084800/Potri.019G055200/Potri.002G076000/Potri.015G0…
GO:0006032	biological_process	chitin catabolic process	0.000780184	11	Potri.007G084700/Potri.019G130700/Potri.011G130800/Potri.011G117600/Potri.007G016400/Potri.005G143900/Potri.008G067500/Potri.005G144000/Potri.007G115500/Potri.009G064900/Potri.011G101500/Potri.011G099200/Potri.013G157900/Potri.014G037600/Potri.011G101700/Potri.014G037900/Potri.009G065000/Potri.014G021700/Potri.007G085000/Potri.019G057901/Potri.007G026500/Potri.012G090000/Potri.011G101250/Potri.00…
GO:0008610	biological_process	lipid biosynthetic process	0.00114335	15	Potri.005G130400/Potri.004G031500/Potri.009G062500/Potri.006G034300/Potri.005G206700/Potri.011G031300/Potri.002G055700/Potri.010G210200/Potri.007G033700/Potri.005G010700/Potri.001G416400/Potri.005G256600/Potri.010G210000/Potri.010G166800/Potri.005G027100/Potri.007G100800
GO:0006559	biological_process	L-phenylalanine catabolic process	0.00114982	5	Potri.011G039100/Potri.001G134900/Potri.011G125901/Potri.001G413400/Potri.011G125000/Potri.011G125401/Potri.007G111100/Potri.001G411700/Potri.011G036100/Potri.011G038800/Potri.011G039200/Potri.005G014900/Potri.011G037900/Potri.013G059900/Potri.011G037300/Potri.001G414000/Potri.011G038524/Potri.011G128900/Potri.008G016900/Potri.011G038000/Potri.001G414200/Potri.011G125501/Potri.010G103300/Potri.01…
GO:0042545	biological_process	cell wall modification	0.00138844	20	Potri.015G040400/Potri.015G040600/Potri.015G040700/Potri.007G088222/Potri.002G227701/Potri.019G088401/Potri.001G118300/Potri.003G075800/Potri.019G088800/Potri.001G219300/Potri.008G073800/Potri.005G247700/Potri.007G023300/Potri.010G193100/Potri.019G088900/Potri.011G120200/Potri.001G401300/Potri.002G013700/Potri.007G088358/Potri.005G079400/Potri.016G112100/Potri.006G087500/Potri.007G038300/Potri.01…
GO:0006952	biological_process	defense response	0.00159286	23	Potri.015G003500/Potri.016G132900/Potri.001G012901/Potri.001G011200/Potri.005G108900/Potri.006G254500/Potri.017G064100/Potri.016G125000/Potri.001G011000/Potri.010G236850/Potri.001G011300/Potri.001G011500/Potri.004G134800/Potri.005G161900/Potri.005G135300/Potri.002G018000/Potri.016G132700/Potri.001G458700/Potri.008G022232/Potri.001G098300/Potri.001G458900/Potri.006G137300/Potri.010G236900/Potri.01…
GO:0006542	biological_process	glutamine biosynthetic process	0.00166087	6	Potri.001G071000/Potri.015G040400/Potri.015G040600/Potri.015G040700/Potri.006G071200/Potri.019G088401/Potri.003G159700/Potri.018G094800/Potri.019G088800/Potri.007G008500/Potri.008G073800/Potri.007G023300/Potri.010G193100/Potri.001G136100/Potri.019G088900/Potri.011G120200/Potri.001G401300/Potri.014G146100/Potri.004G021000/Potri.016G112100/Potri.006G087500/Potri.019G088600/Potri.019G125000/Potri.00…
GO:0005985	biological_process	sucrose metabolic process	0.00177952	7	Potri.005G130400/Potri.004G031500/Potri.009G062500/Potri.010G052000/Potri.001G438800/Potri.006G034300/Potri.005G218800/Potri.001G438700/Potri.005G206700/Potri.011G031300/Potri.008G181900/Potri.002G055700/Potri.010G210200/Potri.018G065200/Potri.007G033700/Potri.005G010700/Potri.011G142200/Potri.001G416400/Potri.006G222300/Potri.005G256600/Potri.010G210000/Potri.002G044300/Potri.010G166800/Potri.01…
GO:0016036	biological_process	cellular response to phosphate starvation	0.00187125	3	Potri.015G003500/Potri.016G132900/Potri.001G012901/Potri.001G011200/Potri.005G108900/Potri.006G254500/Potri.017G064100/Potri.008G198600/Potri.016G125000/Potri.001G011000/Potri.010G236850/Potri.007G126600/Potri.001G011300/Potri.001G011500/Potri.004G134800/Potri.005G161900/Potri.005G135300/Potri.002G018000/Potri.016G132700/Potri.001G458700/Potri.008G022232/Potri.001G458900/Potri.010G236900/Potri.01…
GO:0006629	biological_process	lipid metabolic process	0.0019429	42	Potri.015G040400/Potri.015G040600/Potri.015G040700/Potri.019G088401/Potri.019G088800/Potri.008G073800/Potri.007G023300/Potri.010G193100/Potri.019G088900/Potri.011G120200/Potri.001G401300/Potri.016G112100/Potri.006G087500/Potri.019G088600/Potri.011G120300/Potri.010G183600/Potri.004G156400/Potri.009G042500/Potri.006G087100/Potri.016G112000/Potri.008G073700/Potri.006G096900
GO:0015700	biological_process	arsenite transport	0.00679359	3	Potri.015G040400/Potri.015G040600/Potri.015G040700/Potri.019G088401/Potri.019G088800/Potri.008G073800/Potri.007G023300/Potri.010G193100/Potri.019G088900/Potri.011G120200/Potri.001G401300/Potri.016G112100/Potri.006G087500/Potri.019G088600/Potri.011G120300/Potri.010G183600/Potri.004G156400/Potri.009G042500/Potri.006G087100/Potri.016G112000/Potri.008G073700/Potri.006G096900
GO:0015740	biological_process	C4-dicarboxylate transport	0.00679359	3	Potri.001G071000/Potri.005G167800/Potri.014G125300/Potri.001G225808/Potri.006G071200/Potri.005G059500/Potri.008G079500/Potri.010G001200/Potri.004G202400/Potri.004G159800/Potri.003G159700/Potri.018G094800/Potri.011G044300/Potri.016G138600/Potri.001G226100/Potri.001G223300/Potri.002G093900/Potri.001G200400/Potri.001G255100/Potri.007G008500/Potri.011G154200/Potri.012G033866/Potri.006G109900/Potri.00…
GO:0045017	biological_process	glycerolipid biosynthetic process	0.00688756	5	Potri.003G185175/Potri.001G041700/Potri.004G085000/Potri.019G065100/Potri.019G065200/Potri.019G064800/Potri.005G204800/Potri.010G128200/Potri.001G240600/Potri.004G007600/Potri.015G051800/Potri.008G203100/Potri.002G104600/Potri.018G014800/Potri.003G076300/Potri.001G028200/Potri.007G106300/Potri.018G015100/Potri.019G065000/Potri.008G203200/Potri.006G232400/Potri.006G068900/Potri.001G158600/Potri.00…
GO:0030244	biological_process	cellulose biosynthetic process	0.00821515	8	Potri.001G438800/Potri.001G438700/Potri.007G105900/Potri.011G142200/Potri.019G118500/Potri.001G292000/Potri.005G063300/Potri.013G148900/Potri.011G142501
GO:0015936	biological_process	coenzyme A metabolic process	0.0106873	4	Potri.010G001200/Potri.006G193000/Potri.011G044300/Potri.017G080100/Potri.001G200400/Potri.016G045000/Potri.002G110000/Potri.011G154200/Potri.001G283200/Potri.003G139600/Potri.009G036500/Potri.019G034100/Potri.001G283400/Potri.001G283208/Potri.003G038500/Potri.005G232600/Potri.004G209300/Potri.007G018100/Potri.016G107200/Potri.010G001100/Potri.002G110200/Potri.006G103200/Potri.017G080200/Potri.00…
GO:0009733	biological_process	response to auxin	0.0123715	20	Potri.011G062600/Potri.004G052600/Potri.007G044000/Potri.001G374800/Potri.001G374600/Potri.006G268200/Potri.001G374700/Potri.001G374300/Potri.011G062750/Potri.001G375000/Potri.011G062900/Potri.001G375200/Potri.018G012300/Potri.006G268400/Potri.006G270400/Potri.006G268500/Potri.014G028800/Potri.018G011650/Potri.006G174202/Potri.006G172801/Potri.004G052500
GO:0034551	biological_process	mitochondrial respiratory chain complex III assembly	0.0151893	2	Potri.016G016100/Potri.016G016800/Potri.014G088400/Potri.009G098966/Potri.013G118700/Potri.006G055600/Potri.001G302400/Potri.006G120600/Potri.002G236400/Potri.007G140500/Potri.006G023700/Potri.016G021100/Potri.014G096000/Potri.016G105300/Potri.016G022000/Potri.017G052166/Potri.001G303700/Potri.007G117200/Potri.016G097400/Potri.007G030400/Potri.010G182575/Potri.002G236500/Potri.017G052232/Potri.00…
GO:1902358	biological_process	sulfate transmembrane transport	0.0151893	2	Potri.018G027600/Potri.010G089400/Potri.003G052500/Potri.002G253800/Potri.014G175600/Potri.001G081500/Potri.006G254200/Potri.007G105900/Potri.011G168700/Potri.001G471900/Potri.001G292000/Potri.005G063300/Potri.002G239700/Potri.016G094067
GO:0006826	biological_process	iron ion transport	0.0154257	3	Potri.003G183900/Potri.001G448000/Potri.010G056300/Potri.004G017600/Potri.013G033000/Potri.014G145100/Potri.010G056400/Potri.009G026800/Potri.001G042900/Potri.001G234500/Potri.006G218000/Potri.001G051600/Potri.018G032200/Potri.010G125300/Potri.006G010300/Potri.007G003800/Potri.001G051500/Potri.014G025500/Potri.008G160000/Potri.018G104700/Potri.003G082100/Potri.016G112400/Potri.015G147300/Potri.01…
GO:0006879	biological_process	cellular iron ion homeostasis	0.0154257	3	Potri.001G071000/Potri.012G014500/Potri.006G071200/Potri.002G202500/Potri.002G145500/Potri.015G013700/Potri.003G159700/Potri.018G094800/Potri.015G127700/Potri.006G134600/Potri.007G008500/Potri.014G149700/Potri.001G162500/Potri.001G162600/Potri.001G162400/Potri.002G202600/Potri.001G136100/Potri.006G134500/Potri.011G025400/Potri.014G146100/Potri.018G143400/Potri.004G021000/Potri.006G135100/Potri.00…
GO:0010411	biological_process	xyloglucan metabolic process	0.0251977	11	Potri.009G169900/Potri.003G181400/Potri.004G074900/Potri.004G208500/Potri.001G457000/Potri.007G123700/Potri.016G043400/Potri.001G320000/Potri.001G300900/Potri.017G144541/Potri.004G112800/Potri.002G204400/Potri.008G009500/Potri.004G175800/Potri.006G022000/Potri.008G031700/Potri.001G287400/Potri.004G105000/Potri.003G181800/Potri.006G046900/Potri.001G122600/Potri.013G079500/Potri.003G181600/Potri.00…
GO:0006108	biological_process	malate metabolic process	0.0276504	7	Potri.008G213100/Potri.011G026032/Potri.011G025966/Potri.011G026200/Potri.008G131300/Potri.004G020000/Potri.010G111000/Potri.008G212300/Potri.011G025900/Potri.003G088100/Potri.008G212100/Potri.011G026100/Potri.016G046500/Potri.017G051100
GO:0006081	biological_process	cellular aldehyde metabolic process	0.0280406	3	Potri.005G091901/Potri.002G071800/Potri.018G105700/Potri.013G124900/Potri.003G164000/Potri.006G036400/Potri.005G091800/Potri.009G003100/Potri.010G220100/Potri.001G290900/Potri.007G072300/Potri.001G291800/Potri.004G215400/Potri.012G105500/Potri.004G120100/Potri.001G290800/Potri.001G291300/Potri.006G183200
GO:0009094	biological_process	L-phenylalanine biosynthetic process	0.0280406	3	Potri.005G038350/Potri.005G038301/Potri.010G230433/Potri.001G021300/Potri.001G049501/Potri.005G038250/Potri.010G230366/Potri.010G146200/Potri.001G021200/Potri.001G141801
GO:0010207	biological_process	photosystem II assembly	0.0280406	3	Potri.018G019700/Potri.018G053600/Potri.006G109100/Potri.011G070100/Potri.002G142800/Potri.016G056500/Potri.010G093400/Potri.001G092900/Potri.002G186600/Potri.017G066860/Potri.001G328000/Potri.016G128300/Potri.018G019800/Potri.006G049200/Potri.015G064100/Potri.011G051600/Potri.016G059000/Potri.014G045100/Potri.005G257900/Potri.016G058600/Potri.010G147700/Potri.010G004200/Potri.003G138700/Potri.00…
GO:0042546	biological_process	cell wall biogenesis	0.029224	12	Potri.010G089400/Potri.003G052500/Potri.002G253800/Potri.014G175600/Potri.001G081500/Potri.002G239700
GO:0009073	biological_process	aromatic amino acid family biosynthetic process	0.0293862	5	Potri.008G038200/Potri.006G126800/Potri.010G224100/Potri.010G224200/Potri.016G091100
GO:0006073	biological_process	cellular glucan metabolic process	0.0335536	11	Potri.012G014500/Potri.002G202500/Potri.014G129400/Potri.002G145500/Potri.015G013700/Potri.015G128200/Potri.012G127500/Potri.015G127700/Potri.006G134600/Potri.014G149700/Potri.001G162500/Potri.001G162600/Potri.016G001600/Potri.003G113600/Potri.001G162400/Potri.002G202600/Potri.015G128400/Potri.006G134500/Potri.011G025400/Potri.006G135100/Potri.003G123500/Potri.001G119300/Potri.006G256600/Potri.00…
GO:0070588	biological_process	calcium ion transmembrane transport	0.0368019	6	Potri.013G125000/Potri.004G182000/Potri.019G093900/Potri.019G093700/Potri.006G188400/Potri.018G112100/Potri.018G112000/Potri.018G111600/Potri.009G141800/Potri.018G111800/Potri.018G111700
GO:0009308	biological_process	amine metabolic process	0.0372002	4	Potri.013G125000/Potri.004G182000/Potri.019G093900/Potri.019G093700/Potri.006G188400/Potri.018G112100/Potri.018G112000/Potri.018G111600/Potri.009G141800/Potri.018G111800/Potri.018G111700
GO:0006694	biological_process	steroid biosynthetic process	0.0436955	11	Potri.004G161200/Potri.009G123100/Potri.014G145100/Potri.009G026800/Potri.001G234500/Potri.006G218000/Potri.001G051600/Potri.018G032200/Potri.010G125300/Potri.001G051500/Potri.008G160000/Potri.013G119600/Potri.002G178000/Potri.009G116800/Potri.009G116900
GO:0006537	biological_process	glutamate biosynthetic process	0.0446321	3	Potri.008G038200/Potri.006G126800/Potri.010G224100/Potri.010G224200/Potri.016G091100
GO:0006556	biological_process	S-adenosylmethionine biosynthetic process	0.0446321	3	Potri.012G014500/Potri.002G202500/Potri.002G145500/Potri.015G013700/Potri.015G127700/Potri.006G134600/Potri.014G149700/Potri.001G162500/Potri.001G162600/Potri.001G162400/Potri.002G202600/Potri.006G134500/Potri.011G025400/Potri.006G135100/Potri.006G256600/Potri.003G002800/Potri.011G135000/Potri.018G068400/Potri.015G127800/Potri.016G017700
GO:0006855	biological_process	xenobiotic transmembrane transport	0.0473633	15	Potri.012G014500/Potri.002G202500/Potri.002G145500/Potri.015G013700/Potri.015G127700/Potri.006G134600/Potri.014G149700/Potri.001G162500/Potri.001G162600/Potri.001G162400/Potri.002G202600/Potri.006G134500/Potri.011G025400/Potri.006G135100/Potri.006G256600/Potri.003G002800/Potri.011G135000/Potri.018G068400/Potri.015G127800/Potri.016G017700
GO:0009654	cellular_component	photosystem II oxygen evolving complex	3.17727e-11	20	Potri.008G213100/Potri.011G026032/Potri.011G025966/Potri.011G026200/Potri.008G131300/Potri.005G111400/Potri.004G020000/Potri.010G111000/Potri.008G212300/Potri.011G025900/Potri.003G088100/Potri.008G212100/Potri.003G002500/Potri.011G026100/Potri.002G006700/Potri.004G050000/Potri.016G046500/Potri.016G088000/Potri.017G051100/Potri.011G058900/Potri.018G053000/Potri.017G000900/Potri.001G078800
GO:0019898	cellular_component	extrinsic component of membrane	4.29035e-09	16	Potri.015G034700/Potri.005G093200/Potri.015G034800/Potri.010G029100/Potri.008G200100/Potri.005G252250
GO:0048046	cellular_component	apoplast	2.633e-07	33	Potri.015G034700/Potri.005G093200/Potri.015G034800/Potri.010G029100/Potri.008G200100/Potri.005G252250
GO:0009523	cellular_component	photosystem II	3.47335e-07	26	Potri.004G081300/Potri.015G029200/Potri.013G095500/Potri.017G139100/Potri.012G037200/Potri.018G063500/Potri.015G029100
GO:0042651	cellular_component	thylakoid membrane	7.25612e-06	9	Potri.004G081300/Potri.015G029200/Potri.013G095500/Potri.017G139100/Potri.012G037200/Potri.018G063500/Potri.015G029100
GO:0009522	cellular_component	photosystem I	4.84268e-05	14	Potri.002G143900/Potri.001G135950/Potri.014G061400
GO:0005618	cellular_component	cell wall	0.000116454	32	Potri.001G191400/Potri.003G071400/Potri.019G024700/Potri.004G064500/Potri.011G089700/Potri.001G332300/Potri.001G406500/Potri.018G088800/Potri.006G100300/Potri.019G008300/Potri.015G089700/Potri.018G089300/Potri.006G166800/Potri.010G189300/Potri.018G089200/Potri.018G089400/Potri.019G024800/Potri.001G275500/Potri.004G054400/Potri.013G153000/Potri.014G160100/Potri.013G102400/Potri.010G137100/Potri.00…
GO:0009538	cellular_component	photosystem I reaction center	0.000470483	6	Potri.005G139400/Potri.014G033600/Potri.002G128000/Potri.014G033200/Potri.014G033900/Potri.004G172000/Potri.017G134051/Potri.017G133850/Potri.008G076300/Potri.001G332300/Potri.002G113000/Potri.017G133901/Potri.005G068700/Potri.015G069600/Potri.017G134151/Potri.001G325200/Potri.014G027500/Potri.017G134001/Potri.004G007600/Potri.011G144900/Potri.005G218500/Potri.004G140200/Potri.001G263200/Potri.00…
GO:0009512	cellular_component	cytochrome b6f complex	0.00679359	3	Potri.003G204000/Potri.015G045300/Potri.013G010700/Potri.007G105900/Potri.006G274600/Potri.001G292000/Potri.005G063300/Potri.012G054900/Potri.001G020600/Potri.018G005500/Potri.005G020200
GO:0005576	cellular_component	extracellular region	0.00880478	19	Potri.001G098300/Potri.006G137300/Potri.003G133300/Potri.003G159800/Potri.015G109800/Potri.003G133400
GO:0005874	cellular_component	microtubule	0.0291622	11	Potri.011G158500/Potri.001G461700/Potri.001G463300/Potri.011G155900/Potri.001G462700/Potri.001G459200/Potri.011G158100/Potri.011G160400/Potri.001G459100/Potri.001G461900/Potri.001G462200/Potri.011G159200/Potri.010G168200/Potri.007G066100/Potri.001G111500/Potri.011G162912/Potri.011G158400/Potri.001G459500/Potri.001G461500/Potri.011G156000/Potri.018G039600/Potri.001G462800/Potri.005G232300/Potri.00…
GO:0004497	molecular_function	monooxygenase activity	2.61834e-14	96	Potri.001G304600/Potri.018G066100/Potri.019G070900/Potri.017G010300/Potri.012G014200/Potri.019G070975
GO:0004674	molecular_function	protein serine/threonine kinase activity	1.9004e-12	69	Potri.001G192100/Potri.006G067400/Potri.008G144800/Potri.002G091200/Potri.011G135400/Potri.010G087300/Potri.010G021800/Potri.003G015200/Potri.004G218400/Potri.002G074200/Potri.008G214800/Potri.014G134300/Potri.014G134200/Potri.018G018200/Potri.016G079400/Potri.004G049800/Potri.002G208400/Potri.009G136200/Potri.008G153200/Potri.001G332200/Potri.001G273000/Potri.002G208500/Potri.006G064400/Potri.01…
GO:0030247	molecular_function	polysaccharide binding	2.38074e-12	47	Potri.013G125000/Potri.013G041700/Potri.004G182000/Potri.019G093900/Potri.013G041600/Potri.019G093700/Potri.009G141800
GO:0005509	molecular_function	calcium ion binding	3.76975e-10	96	Potri.019G038268/Potri.009G152800/Potri.013G061800/Potri.019G038352
GO:0016705	molecular_function	oxidoreductase activity, acting on paired donors, with incorporation or reduction of molecular oxygen	1.69877e-09	99	Potri.006G070400/Potri.006G149700/Potri.018G132100
GO:0005507	molecular_function	copper ion binding	8.00925e-09	40	Potri.014G037000/Potri.004G147300/Potri.009G108700
GO:0004601	molecular_function	peroxidase activity	1.10792e-08	44	Potri.017G141600/Potri.017G141800/Potri.017G141950
GO:0052716	molecular_function	hydroquinone:oxygen oxidoreductase activity	4.24164e-07	22	Potri.017G141600/Potri.017G141800/Potri.017G141700
GO:0004553	molecular_function	hydrolase activity, hydrolyzing O-glycosyl compounds	9.64876e-07	90	Potri.017G141600/Potri.017G141800/Potri.017G141950
GO:0004190	molecular_function	aspartic-type endopeptidase activity	2.6097e-06	32	Potri.017G141600/Potri.017G141800/Potri.017G141700
GO:0030246	molecular_function	carbohydrate binding	1.98941e-05	43	Potri.002G187500/Potri.014G113000/Potri.002G187400/Potri.003G034700/Potri.001G139600/Potri.017G081100/Potri.002G019600/Potri.014G113500/Potri.014G113200/Potri.015G023800/Potri.001G362300/Potri.017G074000/Potri.006G074400/Potri.003G094400/Potri.016G122901/Potri.001G139700/Potri.001G362200/Potri.003G198401/Potri.008G179500
GO:0004970	molecular_function	ionotropic glutamate receptor activity	2.61383e-05	21	Potri.001G304600/Potri.019G070900/Potri.017G010300/Potri.012G014200/Potri.019G070975
GO:0016758	molecular_function	hexosyltransferase activity	3.85678e-05	56	Potri.004G117800/Potri.017G099100/Potri.015G099400/Potri.003G142201/Potri.006G004166/Potri.003G142301/Potri.006G004232/Potri.010G074700
GO:0016747	molecular_function	acyltransferase activity, transferring groups other than amino-acyl groups	5.78741e-05	51	Potri.019G057500/Potri.010G167200/Potri.007G088222/Potri.003G083200/Potri.009G085600/Potri.001G219300/Potri.004G123200/Potri.004G188200/Potri.009G031800/Potri.007G088358/Potri.013G060800/Potri.005G079400/Potri.006G108000/Potri.001G240900/Potri.009G148900/Potri.003G087000/Potri.004G181700/Potri.010G171700/Potri.014G014000
GO:0016616	molecular_function	oxidoreductase activity, acting on the CH-OH group of donors, NAD or NADP as acceptor	0.000238842	28	Potri.007G111600/Potri.004G068000/Potri.007G111700/Potri.004G068100/Potri.007G111800/Potri.019G006900/Potri.019G124500/Potri.004G068200/Potri.019G122100/Potri.007G111500/Potri.004G067900/Potri.004G000400/Potri.004G067800/Potri.010G010400/Potri.003G097900
GO:0004185	molecular_function	serine-type carboxypeptidase activity	0.000435169	18	Potri.009G169900/Potri.004G208500/Potri.001G457000/Potri.005G257000
GO:0043565	molecular_function	sequence-specific DNA binding	0.000460569	70	Potri.009G169900/Potri.004G208500/Potri.001G457000/Potri.005G257000
GO:0016841	molecular_function	ammonia-lyase activity	0.00048011	5	Potri.016G106900/Potri.002G069000/Potri.008G063800/Potri.010G193300
GO:0004857	molecular_function	enzyme inhibitor activity	0.000771337	28	Potri.004G161200/Potri.002G109200/Potri.009G123100/Potri.010G254700/Potri.017G059300/Potri.001G320400/Potri.008G002900/Potri.017G138900/Potri.013G145600/Potri.013G137077/Potri.011G074501
GO:0004568	molecular_function	chitinase activity	0.000780184	11	Potri.009G140900/Potri.004G165450/Potri.009G126000/Potri.002G145300/Potri.017G043600/Potri.009G141150/Potri.004G164700/Potri.009G127600/Potri.004G181400/Potri.009G126500/Potri.003G071000/Potri.019G002201/Potri.006G137000/Potri.004G164400/Potri.009G126400/Potri.009G141201/Potri.017G043500/Potri.005G237200/Potri.008G037900/Potri.003G113100
GO:0030599	molecular_function	pectinesterase activity	0.00138844	20	Potri.010G150400/Potri.005G033500/Potri.001G044300/Potri.010G150900/Potri.008G101000/Potri.010G151200/Potri.017G090800/Potri.015G042200/Potri.010G150700/Potri.008G092700/Potri.010G162100/Potri.008G116900/Potri.006G048500/Potri.008G192600/Potri.013G005800/Potri.002G200200/Potri.010G150800/Potri.006G089150/Potri.007G107200/Potri.007G031700/Potri.007G005900/Potri.005G061600/Potri.006G001100
GO:0004356	molecular_function	glutamate-ammonia ligase activity	0.00166087	6	Potri.004G044700/Potri.009G098601/Potri.009G092300/Potri.016G015550/Potri.016G015500/Potri.005G060700
GO:0016157	molecular_function	sucrose synthase activity	0.00177952	7	Potri.012G006400/Potri.011G150500/Potri.001G304800/Potri.001G451100/Potri.013G017210/Potri.009G099800/Potri.016G101600/Potri.014G106500/Potri.015G003100/Potri.013G123000/Potri.005G184001/Potri.009G139800/Potri.008G136600
GO:0016788	molecular_function	hydrolase activity, acting on ester bonds	0.00193334	37	Potri.004G161200/Potri.009G123100
GO:0005516	molecular_function	calmodulin binding	0.00241017	11	Potri.001G134000/Potri.003G099400
GO:0050664	molecular_function	oxidoreductase activity, acting on NAD(P)H, oxygen as acceptor	0.0027641	6	Potri.006G169000/Potri.018G093600
GO:0016614	molecular_function	oxidoreductase activity, acting on CH-OH group of donors	0.0031621	24	Potri.006G027300/Potri.016G025000
GO:0004144	molecular_function	diacylglycerol O-acyltransferase activity	0.00433618	6	Potri.006G156038/Potri.006G158900
GO:0009055	molecular_function	electron transfer activity	0.00501584	40	Potri.016G043400/Potri.006G046900/Potri.013G090900
GO:0008061	molecular_function	chitin binding	0.00561121	7	Potri.003G120300/Potri.001G111700/Potri.003G120400
GO:0003871	molecular_function	5-methyltetrahydropteroyltriglutamate-homocysteine S-methyltransferase activity	0.00591858	4	Potri.016G124900/Potri.016G124700/Potri.006G103900
GO:0004623	molecular_function	phospholipase A2 activity	0.00679359	3	Potri.016G124900/Potri.016G124700/Potri.006G103900
GO:0015105	molecular_function	arsenite transmembrane transporter activity	0.00679359	3	Potri.003G156500/Potri.008G081000/Potri.001G074700/Potri.010G175300/Potri.008G112600
GO:0015556	molecular_function	C4-dicarboxylate transmembrane transporter activity	0.00679359	3	Potri.003G181400/Potri.007G123700/Potri.001G320000/Potri.004G112800/Potri.002G204400/Potri.006G022000/Potri.004G105000/Potri.003G181800/Potri.013G079500/Potri.003G181600/Potri.017G059100
GO:0042626	molecular_function	ATPase-coupled transmembrane transporter activity	0.00681196	19	Potri.001G071000/Potri.006G071200/Potri.003G159700/Potri.018G094800/Potri.007G008500/Potri.001G136100/Potri.014G146100/Potri.004G021000/Potri.019G125000/Potri.009G006600/Potri.014G115000
GO:0004866	molecular_function	endopeptidase inhibitor activity	0.00980306	15	Potri.001G118300/Potri.001G118200/Potri.010G089200/Potri.010G088900
GO:0004420	molecular_function	hydroxymethylglutaryl-CoA reductase (NADPH) activity	0.0106873	4	Potri.013G075400/Potri.015G022100/Potri.013G070500/Potri.009G057200
GO:0042132	molecular_function	fructose 1,6-bisphosphate 1-phosphatase activity	0.0106873	4	Potri.006G236500/Potri.004G112800/Potri.008G031700/Potri.001G287400/Potri.018G046600/Potri.009G081600/Potri.002G141700
GO:0016740	molecular_function	transferase activity	0.0109914	11	Potri.002G081800/Potri.001G259100/Potri.001G412900
GO:0016757	molecular_function	glycosyltransferase activity	0.0125722	23	Potri.009G148800/Potri.008G195700/Potri.011G004700
GO:0005199	molecular_function	structural constituent of cell wall	0.0128989	6	Potri.002G081800/Potri.001G259100/Potri.001G412900
GO:0008171	molecular_function	O-methyltransferase activity	0.0145239	13	Potri.009G148800/Potri.008G195700/Potri.011G004700
GO:0004310	molecular_function	farnesyl-diphosphate farnesyltransferase activity	0.0151893	2	Potri.005G206200/Potri.002G056300/Potri.002G056400
GO:0008974	molecular_function	phosphoribulokinase activity	0.0151893	2	Potri.003G126800/Potri.006G035400/Potri.001G104600/Potri.001G289500/Potri.017G081000/Potri.002G021800/Potri.014G095000/Potri.003G125400/Potri.001G071400/Potri.002G021900
GO:0048529	molecular_function	magnesium-protoporphyrin IX monomethyl ester (oxidative) cyclase activity	0.0151893	2	Potri.003G126800/Potri.006G035400/Potri.001G104600/Potri.001G289500/Potri.017G081000/Potri.002G021800/Potri.014G095000/Potri.003G125400/Potri.002G021900/Potri.004G118700/Potri.007G138600
GO:0004367	molecular_function	glycerol-3-phosphate dehydrogenase [NAD+] activity	0.0154257	3	Potri.001G071000/Potri.006G071200/Potri.003G159700/Potri.018G094800/Potri.007G008500/Potri.001G136100/Potri.014G146100/Potri.004G021000/Potri.001G034100/Potri.019G125000/Potri.009G006600/Potri.014G115000
GO:0004421	molecular_function	hydroxymethylglutaryl-CoA synthase activity	0.0154257	3	Potri.005G073300/Potri.008G040700/Potri.005G162800/Potri.017G088700/Potri.010G221600
GO:0008725	molecular_function	DNA-3-methyladenine glycosylase activity	0.0155314	5	Potri.001G048900/Potri.002G187500/Potri.014G113000/Potri.002G187400/Potri.003G034700/Potri.015G063500/Potri.016G056600/Potri.001G139600/Potri.017G081100/Potri.006G115000/Potri.002G019600/Potri.014G113500/Potri.001G255800/Potri.006G199500/Potri.014G113200/Potri.001G189500/Potri.015G110000/Potri.015G066000/Potri.015G023800/Potri.015G063400/Potri.001G362300/Potri.017G074000/Potri.018G074500/Potri.00…
GO:0003854	molecular_function	3-beta-hydroxy-delta5-steroid dehydrogenase activity	0.0184627	11	Potri.001G071000/Potri.006G071200/Potri.003G159700/Potri.018G094800/Potri.007G008500/Potri.001G136100/Potri.014G146100/Potri.004G021000/Potri.019G125000/Potri.009G006600/Potri.014G115000
GO:0008131	molecular_function	primary amine oxidase activity	0.0261774	4	Potri.001G071000/Potri.006G071200/Potri.003G159700/Potri.018G094800/Potri.007G008500/Potri.001G136100/Potri.014G146100/Potri.004G021000/Potri.019G125000/Potri.009G006600/Potri.014G115000
GO:0016987	molecular_function	sigma factor activity	0.0261774	4	Potri.003G204000/Potri.005G215600/Potri.001G020600/Potri.008G159200/Potri.013G040201/Potri.013G038400
GO:0004030	molecular_function	aldehyde dehydrogenase [NAD(P)+] activity	0.0280406	3	Potri.009G124100/Potri.004G162400/Potri.011G165000/Potri.001G468100
GO:0004664	molecular_function	prephenate dehydratase activity	0.0280406	3	Potri.001G118300/Potri.001G118200/Potri.010G089200/Potri.010G088900
GO:0005200	molecular_function	structural constituent of cytoskeleton	0.0286401	10	Potri.019G075201/Potri.004G185000/Potri.016G031600/Potri.009G145000
GO:0016887	molecular_function	ATP hydrolysis activity	0.0323588	42	Potri.003G142201/Potri.006G004166/Potri.003G142301/Potri.006G004232/Potri.010G074700
GO:0016762	molecular_function	xyloglucan:xyloglucosyl transferase activity	0.0335536	11	Potri.008G040700/Potri.010G221600
GO:0004332	molecular_function	fructose-bisphosphate aldolase activity	0.0372002	4	Potri.001G068200/Potri.003G162000
GO:0080019	molecular_function	fatty-acyl-CoA reductase (alcohol-forming) activity	0.0372002	4	Potri.016G042100/Potri.006G045700
GO:0016760	molecular_function	cellulose synthase (UDP-forming) activity	0.0385157	5	Potri.019G118500/Potri.013G148900
GO:0004107	molecular_function	chorismate synthase activity	0.0418254	2	Potri.001G403300/Potri.011G122400
GO:0004801	molecular_function	transaldolase activity	0.0418254	2	Potri.011G158500/Potri.001G461700/Potri.001G463300/Potri.011G155900/Potri.001G462700/Potri.005G186200/Potri.001G459200/Potri.011G158100/Potri.006G137600/Potri.011G160400/Potri.001G459100/Potri.001G461900/Potri.001G121000/Potri.001G462200/Potri.011G159200/Potri.010G168200/Potri.001G264900/Potri.007G066100/Potri.001G111500/Potri.012G067500/Potri.011G162912/Potri.011G158400/Potri.001G459500/Potri.00…
GO:0008963	molecular_function	phospho-N-acetylmuramoyl-pentapeptide-transferase activity	0.0418254	2	Potri.003G181400/Potri.007G123700/Potri.001G320000/Potri.004G112800/Potri.002G204400/Potri.006G022000/Potri.004G105000/Potri.003G181800/Potri.013G079500/Potri.003G181600/Potri.017G059100
GO:0009496	molecular_function	plastoquinol--plastocyanin reductase activity	0.0418254	2	Potri.001G019400/Potri.006G121700/Potri.004G019900/Potri.009G128500/Potri.015G072600/Potri.010G034700/Potri.015G063500/Potri.012G082100/Potri.013G083300/Potri.009G136600/Potri.001G068600/Potri.008G170100/Potri.001G185700/Potri.001G044900/Potri.005G109300/Potri.003G050900/Potri.001G258600/Potri.015G063400/Potri.011G057800/Potri.003G204600/Potri.016G113300/Potri.004G058800/Potri.012G071400/Potri.00…
GO:0016630	molecular_function	protochlorophyllide reductase activity	0.0418254	2	Potri.002G189200/Potri.013G004100/Potri.014G114700
GO:0050660	molecular_function	flavin adenine dinucleotide binding	0.043679	32	Potri.016G036900/Potri.012G012000/Potri.012G011700
GO:0005215	molecular_function	transporter activity	0.0441215	44	Potri.002G189200/Potri.013G004100/Potri.014G114700
GO:0004478	molecular_function	methionine adenosyltransferase activity	0.0446321	3	Potri.016G124900/Potri.016G124700/Potri.006G103900
GO:0008199	molecular_function	ferric iron binding	0.0446321	3	Potri.014G171800/Potri.008G195100/Potri.014G110000
GO:0008878	molecular_function	glucose-1-phosphate adenylyltransferase activity	0.0446321	3	Potri.016G036900/Potri.012G012000/Potri.012G011700
GO:0015930	molecular_function	glutamate synthase activity	0.0446321	3	Potri.013G160600/Potri.005G183000/Potri.007G106500
GO:0016655	molecular_function	oxidoreductase activity, acting on NAD(P)H, quinone or similar compound as acceptor	0.0446321	3	Potri.008G198600/Potri.012G019200/Potri.009G080700
GO:0033743	molecular_function	peptide-methionine (R)-S-oxide reductase activity	0.0446321	3	Potri.016G078900/Potri.006G212000/Potri.016G079050/Potri.010G075600/Potri.010G075400/Potri.011G110100
GO:0004867	molecular_function	serine-type endopeptidase inhibitor activity	0.045491	6	Potri.007G010200/Potri.015G147600/Potri.013G069600/Potri.011G117100/Potri.012G051900/Potri.002G055100/Potri.002G102100/Potri.011G002600/Potri.011G002800/Potri.003G121400/Potri.003G116700/Potri.011G002200/Potri.005G102800/Potri.002G132300/Potri.017G120400
GO:0015297	molecular_function	antiporter activity	0.0473633	15	Potri.007G010200/Potri.015G147600/Potri.013G069600/Potri.011G117100/Potri.012G051900/Potri.002G055100/Potri.002G102100/Potri.011G002600/Potri.011G002800/Potri.003G121400/Potri.003G116700/Potri.011G002200/Potri.005G102800/Potri.002G132300/Potri.017G120400
