# Supplementary material for: Transcriptome Analysis and Reactive Oxygen Species Detection Suggest Contrasting Molecular Mechanisms in Populus canadensis’ Response to Different Formae Speciales of Marssonina brunnea
Source: Genes (Basel). 2024 Jan 18;15(1):116. doi: 10.3390/genes15010116 (PMC10815367; doi:10.3390/genes15010116)
Supplement: Supplementary file 1 [file genes-15-00116-s001.zip › Supplementary Table S3.xlsx]

## Sheet: Sheet1
Supplementary Table S3. Enriched terms in the KEGG analyses based on the DEGs of MO_treat vs. control and MU_treat vs. control (P < 0.05).
MO_treat vs. control
ID	Description	pvalue	Count	geneID
ko00940	Phenylpropanoid biosynthesis	2.23783e-09	45	Potri.012G006400/Potri.003G183900/Potri.019G130700/Potri.005G117500/Potri.004G134800/Potri.007G030400/Potri.006G169700/Potri.007G122100/Potri.005G108900/Potri.015G003100/Potri.006G129900/Potri.014G143200/Potri.014G106600/Potri.003G188500/Potri.004G015300/Potri.008G038200/Potri.006G024300/Potri.013G156500/Potri.007G016400/MSTRG.8696|Potri.018G104700/Potri.003G059200/Potri.011G150500/Potri.007G0165…
ko00591	Linoleic acid metabolism	4.92964e-06	12	Potri.006G070400/MSTRG.595|Potri.001G015500/MSTRG.2832|Potri.005G032700/Potri.013G022000/Potri.017G046200/Potri.001G015601/Potri.001G167700/MSTRG.594|Potri.001G015400/MSTRG.2833|Potri.005G032400/Potri.001G015300/MSTRG.2835|Potri.005G032600/Potri.018G132100
ko00910	Nitrogen metabolism	2.37608e-05	15	Potri.015G034700/Potri.004G140800/Potri.006G047500/MSTRG.9324|Potri.T124608/MSTRG.1005|Potri.001G348900/Potri.015G081300/MSTRG.2976|Potri.005G156600/Potri.001G348300/Potri.004G213900/Potri.007G114600/Potri.016G079600/Potri.015G111000/Potri.012G011700/Potri.016G043700/Potri.012G087700
ko00040	Pentose and glucuronate interconversions	8.10294e-05	24	Potri.015G087800/Potri.001G052300/Potri.001G162400/Potri.011G159000/Potri.001G162500/Potri.008G182200/Potri.002G202500/Potri.012G091500/Potri.006G256600/Potri.018G051400/Potri.003G002800/Potri.003G002650/Potri.008G094300/Potri.015G127800/Potri.006G256700/Potri.001G339500/Potri.011G135000/Potri.008G032700/Potri.018G068400/Potri.013G013200/Potri.008G011100/Potri.006G122000/Potri.006G135100/Potri.01…
ko04075	Plant hormone signal transduction	0.000520833	54	Potri.005G053800/Potri.005G174000/Potri.002G213100/Potri.005G053900/Potri.006G148100/MSTRG.3343|Potri.005G218200/Potri.013G041300/Potri.005G218300/Potri.004G203400/MSTRG.4642|Potri.008G161200/MSTRG.7833|Potri.015G070000/MSTRG.7711|Potri.015G116900/MSTRG.4366|Potri.007G096400/Potri.001G177500/Potri.001G288301/Potri.004G165450/MSTRG.6938|Potri.013G001300/Potri.009G126500/Potri.005G237200/Potri.004G…
ko02010	ABC transporters	0.00113447	9	Potri.014G113000/Potri.002G187500/MSTRG.144|Potri.001G139600/Potri.017G074000/Potri.002G019600/Potri.017G081100/MSTRG.1679|Potri.002G187400/Potri.003G094400/Potri.001G139700
ko00942	Anthocyanin biosynthesis	0.00196203	3	MSTRG.1395|Potri.002G236400/MSTRG.1396|Potri.002G236500/Potri.013G118700
ko00360	Phenylalanine metabolism	0.00285147	11	Potri.001G118300/MSTRG.120|Potri.001G118200/Potri.008G038200/Potri.005G079200/Potri.017G014100/Potri.002G057400/Potri.006G127000/Potri.010G089200/Potri.010G088900/MSTRG.8230|Potri.017G013800/MSTRG.8231|Potri.017G014000
ko00460	Cyanoamino acid metabolism	0.00342508	14	MSTRG.261|Potri.001G226100/Potri.001G225808/Potri.005G059500/Potri.009G153900/Potri.002G109200/Potri.012G049300/MSTRG.852|Potri.001G227400/Potri.014G022900/MSTRG.2899|Potri.005G082800/MSTRG.2390|Potri.004G110691/Potri.001G409900/Potri.008G094200/MSTRG.2388|Potri.004G109166/MSTRG.853|Potri.001G227300
ko00960	Tropane, piperidine and pyridine alkaloid biosynthesis	0.00362021	10	Potri.001G118300/MSTRG.120|Potri.001G118200/Potri.005G079200/Potri.017G014100/Potri.010G089200/Potri.008G059100/Potri.010G088900/Potri.006G089800/MSTRG.8230|Potri.017G013800/MSTRG.8231|Potri.017G014000
ko00500	Starch and sucrose metabolism	0.00567913	25	MSTRG.261|Potri.001G226100/Potri.001G225808/Potri.005G033500/Potri.005G059500/Potri.002G014300/Potri.009G153900/Potri.012G049300/MSTRG.852|Potri.001G227400/Potri.015G029200/Potri.009G123900/MSTRG.6467|Potri.012G037200/Potri.004G123600/Potri.017G139100/Potri.015G029100/Potri.002G202300/MSTRG.2390|Potri.004G110691/Potri.001G190400/Potri.001G409900/Potri.015G020300/Potri.004G162200/Potri.008G094200/…
ko00592	alpha-Linolenic acid metabolism	0.00893094	13	Potri.006G070400/MSTRG.1528|Potri.002G072100/Potri.005G230100/MSTRG.595|Potri.001G015500/MSTRG.1875|Potri.003G079200/Potri.017G046200/Potri.001G015601/Potri.001G167700/MSTRG.594|Potri.001G015400/Potri.001G015300/Potri.002G130700/Potri.018G132100/Potri.008G106400
ko00999	Biosynthesis of various plant secondary metabolites	0.00943392	12	MSTRG.261|Potri.001G226100/Potri.001G225808/Potri.005G059500/Potri.009G153900/Potri.005G014300/Potri.012G049300/MSTRG.852|Potri.001G227400/MSTRG.2390|Potri.004G110691/Potri.001G409900/Potri.008G094200/MSTRG.2388|Potri.004G109166/MSTRG.853|Potri.001G227300
ko00480	Glutathione metabolism	0.0120671	20	Potri.001G437400/MSTRG.4935|Potri.008G175000/Potri.016G083500/MSTRG.4936|Potri.008G174900/MSTRG.514|Potri.001G436800/Potri.001G437200/MSTRG.1106|Potri.001G437500/Potri.005G038100/MSTRG.6398|Potri.011G140700/Potri.010G061600/Potri.005G112200/MSTRG.2899|Potri.005G082800/Potri.001G431700/Potri.013G072400/Potri.015G019000/Potri.010G061301/Potri.005G038200/Potri.004G080400/Potri.016G118500/Potri.010G0…
ko00380	Tryptophan metabolism	0.0191627	11	Potri.012G006400/Potri.001G259100/Potri.015G003100/Potri.014G106600/Potri.002G081800/Potri.011G150500/Potri.007G084700/Potri.001G451100/MSTRG.4351|Potri.007G085000/MSTRG.7468|Potri.014G106500/Potri.008G174600
ko00950	Isoquinoline alkaloid biosynthesis	0.0193197	9	Potri.001G118300/MSTRG.120|Potri.001G118200/Potri.005G079200/Potri.017G014100/Potri.010G089200/Potri.010G088900/MSTRG.8230|Potri.017G013800/MSTRG.8231|Potri.017G014000/Potri.011G047300
ko00941	Flavonoid biosynthesis	0.0205441	10	Potri.003G183900/Potri.019G130700/MSTRG.8696|Potri.018G104700/Potri.019G015700/Potri.016G031100/Potri.001G113100/Potri.005G229500/MSTRG.3232|Potri.005G113900/Potri.019G001400/Potri.010G129800
ko00620	Pyruvate metabolism	0.0317734	18	Potri.007G011200/Potri.012G002500/Potri.001G259100/MSTRG.1528|Potri.002G072100/Potri.008G114200/MSTRG.1709|Potri.002G214100/MSTRG.2575|Potri.004G075900/Potri.008G027100/Potri.001G122600/Potri.013G060400/MSTRG.2574|Potri.004G076000/Potri.002G081800/Potri.001G145300/MSTRG.4389|Potri.007G108500/Potri.017G101900/Potri.010G131800/Potri.009G084700/Potri.002G141700
ko00350	Tyrosine metabolism	0.0332165	12	Potri.001G118300/MSTRG.120|Potri.001G118200/MSTRG.1528|Potri.002G072100/Potri.005G079200/Potri.017G014100/Potri.002G057400/MSTRG.4389|Potri.007G108500/Potri.010G089200/Potri.010G088900/MSTRG.8230|Potri.017G013800/MSTRG.8231|Potri.017G014000/Potri.011G047300
ko00052	Galactose metabolism	0.036038	12	Potri.008G189400/Potri.006G065700/Potri.004G038100/Potri.003G123700/Potri.017G036700/Potri.007G123400/Potri.006G052800/Potri.010G150400/Potri.001G190400/Potri.010G042000/Potri.014G116800/Potri.T124908
ko00565	Ether lipid metabolism	0.0386074	7	Potri.008G109966/Potri.006G070400/Potri.009G070000/Potri.006G253900/Potri.009G069900/Potri.018G132100/Potri.003G037700
ko00130	Ubiquinone and other terpenoid-quinone biosynthesis	0.0452062	9	Potri.019G130700/Potri.006G169700/Potri.003G188500/Potri.017G014100/Potri.019G049500/Potri.002G057400/Potri.004G028900/MSTRG.8230|Potri.017G013800/MSTRG.8231|Potri.017G014000
ko00053	Ascorbate and aldarate metabolism	0.0495583	9	Potri.001G320000/Potri.001G259100/MSTRG.5705|Potri.010G156500/Potri.002G081800/Potri.017G059100/Potri.005G112200/Potri.008G094300/Potri.008G144500/MSTRG.8071|Potri.016G011000
MU_treat vs. control
ID	Description	pvalue	Count	geneID
ko00940	Phenylpropanoid biosynthesis	2.29594e-16	74	Potri.019G130700/Potri.012G006400/Potri.003G183900/Potri.007G016400/Potri.015G003500/Potri.008G038200/Potri.013G157900/Potri.003G188500/Potri.016G132900/Potri.003G181400/Potri.001G036900/MSTRG.587|Potri.001G012901/Potri.016G078300/Potri.011G150500/MSTRG.586|Potri.001G011200/Potri.001G304800/Potri.005G108900/Potri.001G042900/Potri.003G059200/Potri.001G451100/MSTRG.8288|Potri.017G064100/Potri.009G0…
ko00196	Photosynthesis - antenna proteins	1.15973e-15	21	Potri.010G221100/Potri.011G079500/Potri.002G221400/Potri.001G407100/Potri.006G099500/Potri.001G210000/Potri.008G067300/MSTRG.7652|Potri.015G062200/Potri.014G165100/Potri.019G063101/MSTRG.3572|Potri.006G139600/Potri.003G171500/Potri.008G041000/MSTRG.7543|Potri.014G172400/MSTRG.6374|Potri.011G126700/Potri.014G029700/Potri.005G239300/Potri.005G239200/Potri.002G189300/Potri.003G020400/Potri.001G056700
ko00195	Photosynthesis	4.66709e-14	47	Potri.005G130400/MSTRG.8608|Potri.018G027600/Potri.004G031500/Potri.010G089400/MSTRG.1843|Potri.003G052500/Potri.010G052000/Potri.002G253800/MSTRG.517|Potri.001G438800/Potri.014G175600/Potri.001G081500/Potri.005G218800/MSTRG.2462|Potri.004G199400/Potri.001G438700/Potri.005G206700/Potri.011G031300/Potri.006G254200/Potri.008G181900/Potri.002G055700/Potri.007G105900/MSTRG.5639|Potri.010G210200/Potri…
ko00630	Glyoxylate and dicarboxylate metabolism	4.88811e-08	35	Potri.015G034700/Potri.002G109200/MSTRG.2907|Potri.005G093200/MSTRG.2114|Potri.003G069400/Potri.010G254700/MSTRG.857|Potri.001G230500/MSTRG.3228|Potri.005G108100/MSTRG.2115|Potri.003G069300/Potri.017G059300/Potri.003G089300/Potri.017G114600/MSTRG.6358|Potri.011G112700/MSTRG.961|Potri.001G320400/MSTRG.881|Potri.001G253300/Potri.004G112800/Potri.015G034800/MSTRG.2557|Potri.004G065200/Potri.010G0291…
ko00710	Carbon fixation in photosynthetic organisms	2.30973e-05	30	Potri.001G240300/Potri.006G236500/Potri.017G114600/Potri.008G056300/MSTRG.3395|Potri.005G254100/Potri.004G112800/Potri.009G124100/Potri.008G084500/Potri.008G031700/MSTRG.926|Potri.001G287400/MSTRG.1709|Potri.002G214100/Potri.016G106900/Potri.010G171500/Potri.018G046600/Potri.014G140500/Potri.004G162400/Potri.007G011200/Potri.004G100000/Potri.001G134000/Potri.003G099400/Potri.011G155500/Potri.009G…
ko00941	Flavonoid biosynthesis	3.16701e-05	20	Potri.019G130700/Potri.003G183900/Potri.013G157900/MSTRG.3232|Potri.005G113900/Potri.014G145100/Potri.001G304800/Potri.001G042900/Potri.005G113700/MSTRG.7025|Potri.013G073300/MSTRG.636|Potri.001G051600/Potri.009G099800/Potri.001G113100/Potri.010G213000/MSTRG.637|Potri.001G051500/Potri.006G033300/MSTRG.8696|Potri.018G104700/Potri.005G229500/Potri.018G146100/Potri.019G001400/Potri.008G136600
ko01200	Carbon metabolism	0.000100529	76	Potri.001G240300/Potri.002G109200/Potri.002G093300/MSTRG.2114|Potri.003G069400/Potri.005G099900/Potri.004G074900/Potri.010G254700/MSTRG.857|Potri.001G230500/Potri.003G151100/Potri.017G000300/MSTRG.3228|Potri.005G108100/MSTRG.2115|Potri.003G069300/Potri.006G236500/Potri.017G059300/Potri.003G089300/Potri.017G114600/Potri.008G056300/Potri.001G300900/Potri.017G144541/MSTRG.6358|Potri.011G112700/MSTRG…
ko00500	Starch and sucrose metabolism	0.000175356	41	MSTRG.2580|Potri.004G081300/Potri.001G225808/Potri.005G059500/Potri.014G029400/Potri.005G033500/Potri.005G077200/MSTRG.261|Potri.001G226100/Potri.001G223300/Potri.002G014300/Potri.011G154200/Potri.006G210600/MSTRG.7723|Potri.015G126900/MSTRG.5918|Potri.010G160200/Potri.002G101101/MSTRG.852|Potri.001G227400/Potri.004G019500/Potri.008G174100/Potri.014G171800/Potri.015G029200/Potri.012G049300/MSTRG.…
ko00945	Stilbenoid, diarylheptanoid and gingerol biosynthesis	0.000268942	11	Potri.019G130700/Potri.003G183900/Potri.013G157900/Potri.001G304800/Potri.001G042900/Potri.009G099800/Potri.006G033300/MSTRG.8696|Potri.018G104700/Potri.018G146100/Potri.019G001400/Potri.008G136600
ko00999	Biosynthesis of various plant secondary metabolites	0.000347103	20	Potri.001G225808/Potri.005G059500/Potri.002G189200/Potri.013G004100/MSTRG.3152|Potri.005G043400/MSTRG.261|Potri.001G226100/Potri.001G223300/MSTRG.7477|Potri.014G114700/MSTRG.852|Potri.001G227400/Potri.004G019500/Potri.012G049300/Potri.001G223708/MSTRG.853|Potri.001G227300/Potri.005G014300/Potri.013G029800/MSTRG.2390|Potri.004G110691/Potri.001G222704/Potri.004G019700/Potri.015G041300/Potri.010G159…
ko00480	Glutathione metabolism	0.000605867	33	MSTRG.7797|Potri.015G042000/MSTRG.4936|Potri.008G174900/Potri.001G437400/MSTRG.4935|Potri.008G175000/Potri.004G074900/MSTRG.514|Potri.001G436800/Potri.008G175100/MSTRG.4063|Potri.006G254500/Potri.017G138800/Potri.002G207093/MSTRG.1106|Potri.001G437500/Potri.017G144541/Potri.017G106900/Potri.007G126600/MSTRG.982|Potri.001G337400/Potri.005G161900/Potri.005G038100/Potri.016G083500/MSTRG.1451|Potri.0…
ko02010	ABC transporters	0.000678057	12	Potri.002G187500/Potri.014G113000/MSTRG.1679|Potri.002G187400/MSTRG.144|Potri.001G139600/Potri.017G081100/Potri.002G019600/MSTRG.7474|Potri.014G113500/Potri.014G113200/Potri.017G074000/Potri.006G074400/Potri.003G094400/Potri.001G139700
ko00270	Cysteine and methionine metabolism	0.000802789	35	MSTRG.9168|Potri.019G038268/Potri.017G059400/MSTRG.5179|Potri.009G152800/Potri.005G099900/Potri.001G099400/Potri.002G189200/MSTRG.7304|Potri.014G159000/Potri.001G300900/Potri.004G112800/Potri.013G061800/Potri.008G009500/Potri.013G004100/MSTRG.7477|Potri.014G114700/Potri.019G038352/Potri.014G012600/MSTRG.926|Potri.001G287400/Potri.017G014100/Potri.010G083600/Potri.005G038100/Potri.001G122600/Potri…
ko00909	Sesquiterpenoid and triterpenoid biosynthesis	0.00137818	9	Potri.004G161200/Potri.002G114500/Potri.009G123100/Potri.007G002100/Potri.001G049100/Potri.007G007600/Potri.005G095500/Potri.005G146700/Potri.014G001500
ko01230	Biosynthesis of amino acids	0.0029144	62	MSTRG.9168|Potri.019G038268/Potri.001G240300/Potri.015G034700/Potri.002G109200/MSTRG.2907|Potri.005G093200/Potri.002G146400/Potri.002G093300/MSTRG.5179|Potri.009G152800/Potri.005G099900/Potri.004G074900/Potri.010G254700/Potri.005G073300/MSTRG.4770|Potri.008G040700/MSTRG.857|Potri.001G230500/Potri.003G151100/MSTRG.3228|Potri.005G108100/Potri.005G079200/Potri.005G162800/Potri.017G059300/Potri.008G0…
ko00460	Cyanoamino acid metabolism	0.00378171	19	Potri.002G109200/Potri.001G225808/Potri.005G059500/Potri.010G254700/Potri.017G059300/MSTRG.961|Potri.001G320400/MSTRG.261|Potri.001G226100/Potri.001G223300/MSTRG.4437|Potri.008G002900/MSTRG.852|Potri.001G227400/Potri.004G019500/Potri.012G049300/Potri.001G223708/MSTRG.853|Potri.001G227300/MSTRG.2390|Potri.004G110691/Potri.001G222704/Potri.004G019700/Potri.015G041300/Potri.010G159900
ko00040	Pentose and glucuronate interconversions	0.00630856	27	Potri.015G087800/Potri.002G202500/Potri.001G052300/Potri.002G145500/Potri.015G127700/Potri.008G182200/Potri.001G162500/Potri.012G091500/Potri.001G162400/Potri.002G202600/MSTRG.3220|Potri.005G097000/Potri.011G159000/Potri.006G134500/Potri.011G025400/Potri.006G135100/Potri.008G094300/Potri.010G229000/Potri.003G175900/Potri.006G256600/Potri.003G002800/Potri.008G048600/Potri.008G032700/Potri.011G1350…
ko00942	Anthocyanin biosynthesis	0.00762076	3	Potri.013G118700/MSTRG.1395|Potri.002G236400/MSTRG.1396|Potri.002G236500
ko04626	Plant-pathogen interaction	0.00834571	55	Potri.009G083300/Potri.005G241100/MSTRG.5099|Potri.009G083100/MSTRG.7831|Potri.015G066200/Potri.012G043200/Potri.009G026800/Potri.001G234500/MSTRG.4017|Potri.006G218000/Potri.009G082900/MSTRG.8801|Potri.018G032200/Potri.010G125300/Potri.016G128300/Potri.001G134450/Potri.008G103900/Potri.006G052900/Potri.014G097900/Potri.016G066700/MSTRG.732|Potri.001G134701/Potri.008G160000/Potri.001G098300/MSTRG…
ko00910	Nitrogen metabolism	0.00952995	14	Potri.015G034700/MSTRG.2907|Potri.005G093200/MSTRG.9324|Potri.T124608/Potri.015G034800/Potri.010G029100/Potri.006G047500/Potri.015G081300/MSTRG.1005|Potri.001G348900/MSTRG.4972|Potri.008G200100/Potri.002G088600/Potri.007G114600/MSTRG.7951|Potri.016G036900/Potri.004G213900/Potri.012G011700
ko00260	Glycine, serine and threonine metabolism	0.0101915	22	Potri.002G109200/Potri.002G093300/Potri.005G099900/Potri.010G254700/Potri.017G059300/Potri.003G089300/Potri.001G300900/Potri.001G118300/MSTRG.961|Potri.001G320400/MSTRG.881|Potri.001G253300/Potri.008G009500/Potri.009G047700/MSTRG.4437|Potri.008G002900/Potri.004G175800/Potri.011G006800/Potri.001G111500/Potri.001G144800/MSTRG.9052|Potri.019G071800/MSTRG.120|Potri.001G118200/Potri.010G089200/Potri.0…
ko00603	Glycosphingolipid biosynthesis - globo and isoglobo series	0.012526	5	Potri.004G038100/Potri.016G114200/Potri.008G079400/Potri.011G047700/MSTRG.265|Potri.001G232600
ko00360	Phenylalanine metabolism	0.0143909	13	Potri.008G038200/Potri.005G079200/Potri.001G118300/Potri.006G126800/MSTRG.4201|Potri.007G088426/Potri.017G014100/Potri.010G224100/Potri.010G224200/Potri.016G091100/MSTRG.120|Potri.001G118200/Potri.010G089200/Potri.017G014200/Potri.010G088900
ko00400	Phenylalanine, tyrosine and tryptophan biosynthesis	0.01828	16	Potri.002G146400/Potri.005G073300/MSTRG.4770|Potri.008G040700/Potri.005G079200/Potri.005G162800/Potri.017G088700/MSTRG.3152|Potri.005G043400/MSTRG.4201|Potri.007G088426/Potri.017G014100/Potri.009G148800/Potri.010G221600/Potri.008G074500/Potri.013G029800/Potri.008G195700/Potri.011G004700/Potri.017G014200
ko00904	Diterpenoid biosynthesis	0.0204006	11	Potri.004G037900/Potri.005G184200/Potri.005G184400/Potri.002G191900/Potri.015G134600/Potri.007G103800/Potri.002G052100/Potri.004G022800/Potri.010G149800/Potri.001G176600/Potri.013G125300
ko00380	Tryptophan metabolism	0.0233263	15	Potri.007G084700/Potri.012G006400/MSTRG.4351|Potri.007G085000/Potri.011G150500/Potri.001G451100/Potri.002G081800/Potri.005G186200/Potri.001G259100/Potri.002G189900/MSTRG.2918|Potri.005G100400/Potri.007G084200/MSTRG.7468|Potri.014G106500/Potri.015G003100/Potri.008G174600/MSTRG.3305|Potri.005G184001
ko00565	Ether lipid metabolism	0.0264222	10	Potri.008G109966/MSTRG.6951|Potri.013G012300/Potri.006G070400/MSTRG.701|Potri.001G112100/Potri.001G275500/Potri.012G099300/Potri.006G253900/Potri.003G037700/Potri.015G097900/Potri.018G132100
ko00670	One carbon pool by folate	0.0313617	8	Potri.002G109200/Potri.010G254700/Potri.017G000300/Potri.017G059300/MSTRG.961|Potri.001G320400/MSTRG.4437|Potri.008G002900/Potri.011G006800/Potri.017G123300
ko00960	Tropane, piperidine and pyridine alkaloid biosynthesis	0.0324516	11	Potri.014G145100/MSTRG.636|Potri.001G051600/Potri.005G079200/Potri.001G118300/MSTRG.4201|Potri.007G088426/MSTRG.637|Potri.001G051500/Potri.017G014100/MSTRG.120|Potri.001G118200/Potri.010G089200/Potri.017G014200/Potri.010G088900
ko00130	Ubiquinone and other terpenoid-quinone biosynthesis	0.0336258	13	Potri.019G130700/MSTRG.6176|Potri.011G129400/Potri.013G157900/Potri.003G188500/Potri.001G036900/MSTRG.6254|Potri.011G033100/Potri.017G014100/Potri.018G094200/Potri.018G146100/Potri.008G159400/Potri.004G028900/Potri.003G099700/Potri.017G014200
ko00564	Glycerophospholipid metabolism	0.0343509	24	Potri.003G061700/Potri.018G096700/Potri.016G043400/Potri.008G109966/MSTRG.6951|Potri.013G012300/Potri.014G085500/Potri.006G070400/Potri.006G120700/Potri.016G113100/MSTRG.701|Potri.001G112100/MSTRG.965|Potri.001G325200/Potri.005G197500/Potri.006G046900/Potri.001G275500/Potri.001G259204/Potri.012G099300/Potri.006G253900/Potri.003G060300/Potri.003G037700/Potri.002G192600/Potri.012G047301/Potri.015G0…
ko00052	Galactose metabolism	0.0360022	17	Potri.017G036700/Potri.003G151100/Potri.010G150400/Potri.010G150900/MSTRG.8313|Potri.017G080100/Potri.014G118400/Potri.008G101000/Potri.010G151200/Potri.011G154200/Potri.006G210600/MSTRG.3220|Potri.005G097000/Potri.004G038100/Potri.010G150700/Potri.017G080200/MSTRG.6944|Potri.013G005800/Potri.010G150800/Potri.006G052800
ko00053	Ascorbate and aldarate metabolism	0.0380819	13	Potri.002G081800/MSTRG.4063|Potri.006G254500/Potri.001G320000/Potri.001G259100/Potri.006G014900/MSTRG.829|Potri.001G219300/Potri.005G161900/Potri.002G189900/Potri.017G126100/Potri.008G094300/Potri.017G059100/Potri.018G069700/Potri.012G128200
ko00062	Fatty acid elongation	0.0429416	13	Potri.009G026800/Potri.001G234500/MSTRG.4017|Potri.006G218000/MSTRG.8801|Potri.018G032200/Potri.010G125300/Potri.008G160000/MSTRG.5777|Potri.010G052500/MSTRG.4115|Potri.007G010900/Potri.013G119600/Potri.002G178000/MSTRG.863|Potri.001G235400/Potri.009G116800/MSTRG.5135|Potri.009G116900
ko00601	Glycosphingolipid biosynthesis - lacto and neolacto series	0.0451466	2	Potri.016G114200/Potri.011G047700
