# Supplementary material for: Transcriptome Analysis and Reactive Oxygen Species Detection Suggest Contrasting Molecular Mechanisms in Populus canadensis’ Response to Different Formae Speciales of Marssonina brunnea
Source: Genes (Basel). 2024 Jan 18;15(1):116. doi: 10.3390/genes15010116 (PMC10815367; doi:10.3390/genes15010116)
Supplement: Supplementary file 1 [file genes-15-00116-s001.zip › Supplementary Table S4.xlsx]

## Sheet: Table legend
Supplementary Table S4. Details of Mapman analysis.

## Sheet: ABA
BinCode	BinName	id	description	log2FoldChange
17.1.1	hormone metabolism.abscisic acid.synthesis-degradation	potri.006g205300	moderately similar to ( 231) AT2G36020 | Symbols: HVA22J | HVA22J (HVA22-LIKE PROTEIN J) | chr2:15123424-15125140 REVERSEweakly similar to ( 187) loc_os02g02920 12002.m100077 protein receptor expression-enhancing protein 3, putative, expressed no original description	-2.21335
17.1.1.1.10	hormone metabolism.abscisic acid.synthesis-degradation.synthesis.9-cis-epoxycarotenoid dioxygenase	potri.001g265600	highly similar to ( 892) AT3G63520 | Symbols: CCD1, ATCCD1, ATNCED1, NCED1 | CCD1 (CAROTENOID CLEAVAGE DIOXYGENASE 1); 9-cis-epoxycarotenoid dioxygenase | chr3:23452940-23455896 FORWARDhighly similar to ( 837) loc_os12g44310 12012.m26998 protein 9,10-9,10 carotenoid cleavage dioxygenase 1, putative, expressedRPE65 COG3670 no original description	-2.02064
17.1.1.1.10	hormone metabolism.abscisic acid.synthesis-degradation.synthesis.9-cis-epoxycarotenoid dioxygenase	potri.018g043000	moderately similar to ( 234) AT3G63520 | Symbols: CCD1, ATCCD1, ATNCED1, NCED1 | CCD1 (CAROTENOID CLEAVAGE DIOXYGENASE 1); 9-cis-epoxycarotenoid dioxygenase | chr3:23452940-23455896 FORWARDhighly similar to ( 577) loc_os08g28240 12008.m06830 protein crocetin dialdehyde, putative, expressedRPE65 COG3670 no original description	-5.67426
17.1.1.1.10	hormone metabolism.abscisic acid.synthesis-degradation.synthesis.9-cis-epoxycarotenoid dioxygenase	potri.018g043500	moderately similar to ( 237) AT3G63520 | Symbols: CCD1, ATCCD1, ATNCED1, NCED1 | CCD1 (CAROTENOID CLEAVAGE DIOXYGENASE 1); 9-cis-epoxycarotenoid dioxygenase | chr3:23452940-23455896 FORWARDhighly similar to ( 583) loc_os08g28240 12008.m06830 protein crocetin dialdehyde, putative, expressedRPE65 COG3670 no original description	-3.42046
17.1.3	hormone metabolism.abscisic acid.induced-regulated-responsive-activated	potri.003g165600	moderately similar to ( 300) AT5G13200 | Symbols: | GRAM domain-containing protein / ABA-responsive protein-related | chr5:4207081-4208079 FORWARDmoderately similar to ( 229) loc_os12g29400 12012.m06754 protein ABA-responsive protein, putative, expressed no original description	-4.09124
17.1.3	hormone metabolism.abscisic acid.induced-regulated-responsive-activated	potri.001g323300	moderately similar to ( 271) AT5G13200 | Symbols: | GRAM domain-containing protein / ABA-responsive protein-related | chr5:4207081-4208079 FORWARDmoderately similar to ( 244) loc_os12g29400 12012.m06754 protein ABA-responsive protein, putative, expressed no original description	-2.59742
17.1.3	hormone metabolism.abscisic acid.induced-regulated-responsive-activated	potri.003g165700	moderately similar to ( 296) AT5G13200 | Symbols: | GRAM domain-containing protein / ABA-responsive protein-related | chr5:4207081-4208079 FORWARDmoderately similar to ( 228) loc_os12g29400 12012.m06754 protein ABA-responsive protein, putative, expressed no original description	-3.65024

## Sheet: Abiotic stress
BinCode	BinName	id	description	log2FoldChange
20.2	stress.abiotic	potri.008g106400	highly similar to ( 926) AT3G01420 | Symbols: ALPHA-DOX1, DOX1, DIOX1 | DOX1; lipoxygenase | chr3:159689-162726 REVERSEhighly similar to ( 811) loc_os12g26290 12012.m27040 protein alpha-DOX2, putative, expressedAn_peroxidase no original description	-3.51945
20.2	stress.abiotic	potri.001g110300	moderately similar to ( 212) AT5G52060 | Symbols: ATBAG1 | ATBAG1 (ARABIDOPSIS THALIANA BCL-2-ASSOCIATED ATHANOGENE 1); protein binding | chr5:21152449-21153741 REVERSEmoderately similar to ( 208) loc_os09g35630 12009.m06514 protein protein binding protein, putative, expressedBAG1_N no original description	2.16152
20.2	stress.abiotic	potri.002g143900	moderately similar to ( 265) AT2G45130 | Symbols: ATSPX3, SPX3 | SPX3 (SPX DOMAIN GENE 3) | chr2:18606489-18607754 FORWARDmoderately similar to ( 245) loc_os03g29250 12003.m08200 protein ids4-like protein, putative, expressedSPX COG5036 no original description	-4.91565
20.2	stress.abiotic	potri.014g061400	moderately similar to ( 258) AT2G45130 | Symbols: ATSPX3, SPX3 | SPX3 (SPX DOMAIN GENE 3) | chr2:18606489-18607754 FORWARDmoderately similar to ( 246) loc_os03g29250 12003.m08200 protein ids4-like protein, putative, expressedSPX no original description	-4.26236
20.2.1	stress.abiotic.heat	potri.001g347600	weakly similar to ( 146) AT5G23240 | Symbols: | DNAJ heat shock N-terminal domain-containing protein | chr5:7826857-7828534 REVERSEweakly similar to ( 183) loc_os06g28050 12006.m32226 protein 3Fe-4S ferredoxin, putative, expressed no original description	2.23649
20.2.1	stress.abiotic.heat	potri.004g187400	weakly similar to ( 177) AT2G29500 | Symbols: | 17.6 kDa class I small heat shock protein (HSP17.6B-CI) | chr2:12633279-12633740 REVERSEweakly similar to ( 191) HSP11_SOYBN 17.3 kDa class I heat shock protein (HSP 17.3) - Glycine max (Soybean)weakly similar to ( 152) loc_os03g16020 12003.m101285 protein 17.4 kDa class I heat shock protein 2, putative, expressedHSP20 alpha-crystallin-Hsps IbpA no …	-3.90145
20.2.1	stress.abiotic.heat	potri.010g195700	weakly similar to ( 178) AT5G59720 | Symbols: HSP18.2 | HSP18.2 (heat shock protein 18.2) | chr5:24062632-24063117 FORWARDweakly similar to ( 196) HSP11_DAUCA 17.8 kDa class I heat shock protein (Clone DCHSP17.7) - Daucus carota (Carrot)weakly similar to ( 169) loc_os01g04380 12001.m07073 protein 16.9 kDa class I heat shock protein 2, putative, expressedHSP20 alpha-crystallin-Hsps IbpA no origina…	-2.29651
20.2.1	stress.abiotic.heat	potri.011g051600	weakly similar to ( 114) AT5G16820 | Symbols: HSF3, HSFA1B, ATHSFA1B | HSF3 (HEAT SHOCK FACTOR 3); DNA binding / transcription factor | chr5:5530446-5532497 FORWARDweakly similar to ( 120) loc_os07g08140 12007.m05271 protein heat shock factor protein HSF30, putative, expressedHSF_DNA-bind HSF HSF1 no original description	-2.24794
20.2.1	stress.abiotic.heat	potri.013g109000	moderately similar to ( 292) AT4G09350 | Symbols: | DNAJ heat shock N-terminal domain-containing protein | chr4:5931317-5932152 REVERSEmoderately similar to ( 262) loc_os11g10990 12011.m05292 protein heat shock protein binding protein, putative, expressedDnaJ DnaJ no original description	2.36824
20.2.3	stress.abiotic.drought/salt	potri.001g380000	moderately similar to ( 326) AT3G62730 | Symbols: | unknown protein | chr3:23208003-23209436 REVERSEmoderately similar to ( 282) loc_os03g22470 12003.m07649 protein desiccation-related protein PCC13-62 precursor, putative, expressed no original description	-5.00185
20.2.5	stress.abiotic.light	potri.009g037000	moderately similar to ( 452) AT3G46780 | Symbols: PTAC16 | PTAC16 (PLASTID TRANSCRIPTIONALLY ACTIVE 16); binding / catalytic | chr3:17228766-17231021 FORWARDmoderately similar to ( 330) loc_os05g22614 12005.m28013 protein expressed protein no original description	2.02787
20.2.99	stress.abiotic.unspecified	potri.013g063100	moderately similar to ( 273) AT5G39130 | Symbols: | germin-like protein, putative | chr5:15665638-15666413 REVERSEmoderately similar to ( 231) GLP1_MESCR Germin-like protein precursor - Mesembryanthemum crystallinum (Common ice plant)moderately similar to ( 244) loc_os02g29000 12002.m08044 protein germin-like protein subfamily 1 member 11 precursor, putativeCupin_1 no original description	-8.52341
20.2.99	stress.abiotic.unspecified	potri.010g038200	moderately similar to ( 236) AT1G10460 | Symbols: GLP7 | GLP7 (GERMIN-LIKE PROTEIN 7); manganese ion binding / nutrient reservoir | chr1:3439578-3440231 REVERSEweakly similar to ( 157) NEC1_NICPL Nectarin-1 precursor (EC 1.15.1.1) (Superoxide dismutase [Mn]) - Nicotiana plumbaginifolia (Leadwort-leaved tobacco)moderately similar to ( 221) loc_os03g08150 12003.m06324 protein germin-like protein su…	-4.6873
20.2.99	stress.abiotic.unspecified	potri.013g112300	weakly similar to ( 111) AT1G68300 | Symbols: | universal stress protein (USP) family protein | chr1:25598518-25599261 REVERSEweakly similar to ( 108) loc_os01g32780 12001.m09597 protein ethylene-responsive protein, putative, expressed no original description	2.26759
20.2.99	stress.abiotic.unspecified	potri.017g051100	weakly similar to ( 111) AT1G70840 | Symbols: MLP31 | MLP31 (MLP-LIKE PROTEIN 31) | chr1:26713170-26714014 REVERSEBet_v_I no original description	2.91841
20.2.99	stress.abiotic.unspecified	potri.013g064100	moderately similar to ( 271) AT5G39130 | Symbols: | germin-like protein, putative | chr5:15665638-15666413 REVERSEmoderately similar to ( 230) GLP1_MESCR Germin-like protein precursor - Mesembryanthemum crystallinum (Common ice plant)moderately similar to ( 243) loc_os02g29000 12002.m08044 protein germin-like protein subfamily 1 member 11 precursor, putativeCupin_1 no original description	-7.02249
20.2.99	stress.abiotic.unspecified	potri.013g052100	moderately similar to ( 273) AT5G39110 | Symbols: | germin-like protein, putative | chr5:15657802-15658584 REVERSEmoderately similar to ( 214) GLP1_MESCR Germin-like protein precursor - Mesembryanthemum crystallinum (Common ice plant)moderately similar to ( 270) loc_os02g29000 12002.m08044 protein germin-like protein subfamily 1 member 11 precursor, putativeCupin_1 no original description	-6.85993

## Sheet: Auxins
BinCode	BinName	id	description
17.2.3	hormone metabolism.auxin.induced-regulated-responsive-activated	potri.013g144300	highly similar to ( 853) AT4G03400 | Symbols: DFL2, GH3-10 | DFL2 (DWARF IN LIGHT 2) | chr4:1497675-1499729 REVERSEhighly similar to ( 582) GH35_ORYSA Probable indole-3-acetic acid-amido synthetase GH3.5 (EC 6.3.2.-) (Auxin-responsive GH3-like protein 5) (OsGH3-5) - Oryza sativa (Rice)highly similar to ( 582) loc_os05g50890 12005.m27991 protein indole-3-acetic acid-amido synthetase GH3.5, putativ…	2.81041
17.2.3	hormone metabolism.auxin.induced-regulated-responsive-activated	potri.010g156600	moderately similar to ( 472) AT5G47530 | Symbols: | auxin-responsive protein, putative | chr5:19281471-19282870 FORWARDmoderately similar to ( 351) loc_os03g09900 12003.m06444 protein membrane protein, putative, expressedDUF568 B561 no original description	2.79815
17.2.3	hormone metabolism.auxin.induced-regulated-responsive-activated	potri.011g049900	moderately similar to ( 381) AT4G27450 | Symbols: | unknown protein | chr4:13727665-13728683 REVERSEweakly similar to ( 116) TSJT1_TOBAC Stem-specific protein TSJT1 - Nicotiana tabacum (Common tobacco)moderately similar to ( 215) loc_os03g53270 12003.m35408 protein stem-specific protein TSJT1, putative, expressedWali7 no original description	-2.26964
17.2.3	hormone metabolism.auxin.induced-regulated-responsive-activated	potri.019g103500	highly similar to ( 899) AT4G03400 | Symbols: DFL2, GH3-10 | DFL2 (DWARF IN LIGHT 2) | chr4:1497675-1499729 REVERSEhighly similar to ( 599) GH35_ORYSA Probable indole-3-acetic acid-amido synthetase GH3.5 (EC 6.3.2.-) (Auxin-responsive GH3-like protein 5) (OsGH3-5) - Oryza sativa (Rice)highly similar to ( 599) loc_os05g50890 12005.m27991 protein indole-3-acetic acid-amido synthetase GH3.5, putativ…	6.01048
17.2.3	hormone metabolism.auxin.induced-regulated-responsive-activated	potri.002g145300	weakly similar to ( 169) AT3G60690 | Symbols: | auxin-responsive family protein | chr3:22435262-22435774 FORWARDAuxin_inducible no original description	-2.35077
17.2.3	hormone metabolism.auxin.induced-regulated-responsive-activated	potri.004g040600	moderately similar to ( 366) AT4G27450 | Symbols: | unknown protein | chr4:13727665-13728683 REVERSEweakly similar to ( 122) TSJT1_TOBAC Stem-specific protein TSJT1 - Nicotiana tabacum (Common tobacco)moderately similar to ( 213) loc_os03g53270 12003.m35408 protein stem-specific protein TSJT1, putative, expressedWali7 no original description	-2.4756

## Sheet: Beta glucanase
BinCode	BinName	id	description	log2FoldChange
26.4	misc.beta 1,3 glucan hydrolases	potri.009g087800	highly similar to ( 574) AT4G33840 | Symbols: | glycosyl hydrolase family 10 protein | chr4:16223694-16226095 REVERSEhighly similar to ( 562) loc_os03g10478 12003.m06501 protein 1,4-beta-xylanase, putative, expressedGlyco_10 Glyco_hydro_10 XynA no original description	3.04837
26.4.1	misc.beta 1,3 glucan hydrolases.glucan endo-1,3-beta-glucosidase	potri.004g202400	highly similar to ( 523) AT2G27500 | Symbols: | glycosyl hydrolase family 17 protein | chr2:11752364-11753514 REVERSEmoderately similar to ( 237) E13B_WHEAT Glucan endo-1,3-beta-glucosidase precursor (EC 3.2.1.39) ((1->3)-beta-glucan endohydrolase) ((1->3)-beta-glucanase) (Beta-1,3-endoglucanase) - Triticum aestivum (Wheat)moderately similar to ( 452) loc_os04g33640 12004.m35305 protein glucan en…	2.02384
26.4.1	misc.beta 1,3 glucan hydrolases.glucan endo-1,3-beta-glucosidase	potri.016g057600	moderately similar to ( 402) AT3G57270 | Symbols: BG1 | BG1 (BETA-1,3-GLUCANASE 1); catalytic/ cation binding / hydrolase, hydrolyzing O-glycosyl compounds | chr3:21191336-21193118 REVERSEmoderately similar to ( 420) E13B_PRUPE Glucan endo-1,3-beta-glucosidase, basic isoform precursor (EC 3.2.1.39) ((1->3)-beta-glucan endohydrolase) ((1->3)-beta-glucanase) (Beta-1,3-endoglucanase) (PpGns1) - Prun…	-2.58456
26.4.1	misc.beta 1,3 glucan hydrolases.glucan endo-1,3-beta-glucosidase	potri.016g057400	moderately similar to ( 402) AT3G57270 | Symbols: BG1 | BG1 (BETA-1,3-GLUCANASE 1); catalytic/ cation binding / hydrolase, hydrolyzing O-glycosyl compounds | chr3:21191336-21193118 REVERSEmoderately similar to ( 437) E13B_PRUPE Glucan endo-1,3-beta-glucosidase, basic isoform precursor (EC 3.2.1.39) ((1->3)-beta-glucan endohydrolase) ((1->3)-beta-glucanase) (Beta-1,3-endoglucanase) (PpGns1) - Prun…	-2.60068
26.4.1	misc.beta 1,3 glucan hydrolases.glucan endo-1,3-beta-glucosidase	potri.001g255100	moderately similar to ( 354) AT4G16260 | Symbols: | catalytic/ cation binding / hydrolase, hydrolyzing O-glycosyl compounds | chr4:9200180-9201441 REVERSEmoderately similar to ( 380) E13B_HEVBR Glucan endo-1,3-beta-glucosidase, basic vacuolar isoform precursor (EC 3.2.1.39) ((1->3)-beta-glucan endohydrolase) ((1->3)-beta-glucanase) (Beta-1,3-endoglucanase) [Contains: Glucan endo-1,3-beta-glucosid…	-4.81592
26.4.1	misc.beta 1,3 glucan hydrolases.glucan endo-1,3-beta-glucosidase	potri.010g142800	moderately similar to ( 420) AT4G16260 | Symbols: | catalytic/ cation binding / hydrolase, hydrolyzing O-glycosyl compounds | chr4:9200180-9201441 REVERSEhighly similar to ( 509) E13B_HEVBR Glucan endo-1,3-beta-glucosidase, basic vacuolar isoform precursor (EC 3.2.1.39) ((1->3)-beta-glucan endohydrolase) ((1->3)-beta-glucanase) (Beta-1,3-endoglucanase) [Contains: Glucan endo-1,3-beta-glucosidase …	-2.61179

## Sheet: B-ZIP
BinCode	BinName	id	description	log2FoldChange
27.3.35	RNA.regulation of transcription.bZIP transcription factor family	potri.007g019900	weakly similar to ( 117) AT1G75390 | Symbols: AtbZIP44 | AtbZIP44 (Arabidopsis thaliana basic leucine-zipper 44); DNA binding / protein heterodimerization/ transcription factor | chr1:28292224-28292665 FORWARDvery weakly similar to (91.3) loc_os02g03960 12002.m05745 protein ocs element-binding factor 1, putative, expressed no original description	-2.71597
27.3.35	RNA.regulation of transcription.bZIP transcription factor family	potri.005g119300	weakly similar to ( 111) AT1G75390 | Symbols: AtbZIP44 | AtbZIP44 (Arabidopsis thaliana basic leucine-zipper 44); DNA binding / protein heterodimerization/ transcription factor | chr1:28292224-28292665 FORWARDvery weakly similar to (91.7) loc_os02g03960 12002.m05745 protein ocs element-binding factor 1, putative, expressed no original description	-2.60855

## Sheet: Cell wall
BinCode	BinName	id	description	log2FoldChange
10.2	cell wall.cellulose synthesis	potri.010g234100	highly similar to ( 873) AT5G03760 | Symbols: ATCSLA09, CSLA09, ATCSLA9, CSLA9, RAT4 | ATCSLA09; mannan synthase/ transferase, transferring glycosyl groups | chr5:985910-990087 REVERSEhighly similar to ( 818) loc_os06g42020 12006.m08734 protein CSLA9 - cellulose synthase-like family A, expressedCOG1215 bcsA PRK11204 no original description	-2.34385
10.2.1	cell wall.cellulose synthesis.cellulose synthase	potri.003g142500	highly similar to ( 805) AT4G23990 | Symbols: ATCSLG3, CSLG3 | ATCSLG3; cellulose synthase/ transferase/ transferase, transferring glycosyl groups | chr4:12456491-12460498 FORWARDmoderately similar to ( 491) loc_os09g30130 12009.m060004 protein CSLE6 - cellulose synthase-like family E, expressedCellulose_synt no original description	-2.51772
10.2.2	cell wall.cellulose synthesis.COBRA	potri.014g125300	highly similar to ( 748) AT4G16120 | Symbols: ATSEB1, COBL7, SEB1 | COBL7 (COBRA-LIKE 7) | chr4:9116591-9119138 REVERSEweakly similar to ( 126) COBL7_ORYSA COBRA-like 7 protein precursor (BRITTLE CULM1-like 3 protein) - Oryza sativa (Rice)highly similar to ( 555) loc_os03g18910 12003.m07310 protein COBRA-like protein 7 precursor, putative, expressedPhytochel_synth no original description	-3.06037
10.3	cell wall.hemicellulose synthesis	potri.001g034100	highly similar to ( 563) AT2G03220 | Symbols: FT1, ATFUT1, ATFT1, MUR2 | FT1 (FUCOSYLTRANSFERASE 1); fucosyltransferase/ transferase, transferring glycosyl groups | chr2:970401-972353 REVERSEhighly similar to ( 565) FUT1_PEA Galactoside 2-alpha-L-fucosyltransferase (EC 2.4.1.69) (Xyloglucan alpha-(1,2)-fucosyltransferase) (PsFT1) - Pisum sativum (Garden pea)highly similar to ( 512) loc_os02g52630…	-3.27539
10.5.1.1	cell wall.cell wall proteins.AGPs.AGP	potri.019g121100	weakly similar to ( 155) AT5G60490 | Symbols: FLA12 | FLA12 | chr5:24325916-24326665 REVERSEweakly similar to ( 128) loc_os01g06580 12001.m07288 protein fasciclin-like arabinogalactan protein 7 precursor, putative, expressed no original description	5.55133
10.5.1.1	cell wall.cell wall proteins.AGPs.AGP	potri.013g151500	weakly similar to ( 155) AT5G60490 | Symbols: FLA12 | FLA12 | chr5:24325916-24326665 REVERSEweakly similar to ( 126) loc_os01g06580 12001.m07288 protein fasciclin-like arabinogalactan protein 7 precursor, putative, expressed no original description	6.61247
10.5.1.1	cell wall.cell wall proteins.AGPs.AGP	potri.013g014200	weakly similar to ( 155) AT5G60490 | Symbols: FLA12 | FLA12 | chr5:24325916-24326665 REVERSEweakly similar to ( 125) loc_os01g06580 12001.m07288 protein fasciclin-like arabinogalactan protein 7 precursor, putative, expressed no original description	5.56257
10.5.1.1	cell wall.cell wall proteins.AGPs.AGP	potri.009g012200	weakly similar to ( 157) AT5G60490 | Symbols: FLA12 | FLA12 | chr5:24325916-24326665 REVERSEweakly similar to ( 125) loc_os01g06580 12001.m07288 protein fasciclin-like arabinogalactan protein 7 precursor, putative, expressed no original description	6.31994
10.6.2	cell wall.degradation.mannan-xylose-arabinose-fucose	potri.001g206800	nearly identical (1163) AT5G64570 | Symbols: XYL4, ATBXL4 | XYL4; hydrolase, hydrolyzing O-glycosyl compounds / xylan 1,4-beta-xylosidase | chr5:25810227-25813309 REVERSEmoderately similar to ( 444) XYNB_PRUPE Putative beta-D-xylosidase (EC 3.2.1.-) (PpAz152) (Fragment) - Prunus persica (Peach)nearly identical (1056) loc_os04g54810 12004.m10373 protein beta-D-xylosidase, putative, expressedBglX G…	4.46398
10.6.2	cell wall.degradation.mannan-xylose-arabinose-fucose	potri.014g122200	nearly identical (1153) AT1G02640 | Symbols: BXL2, ATBXL2 | BXL2 (BETA-XYLOSIDASE 2); hydrolase, hydrolyzing O-glycosyl compounds | chr1:564293-567580 FORWARDhighly similar to ( 632) XYNB_PRUPE Putative beta-D-xylosidase (EC 3.2.1.-) (PpAz152) (Fragment) - Prunus persica (Peach)highly similar to ( 837) loc_os04g54810 12004.m10373 protein beta-D-xylosidase, putative, expressedGlyco_hydro_3_C Glyco…	-2.00682
10.6.2	cell wall.degradation.mannan-xylose-arabinose-fucose	potri.009g087800	highly similar to ( 574) AT4G33840 | Symbols: | glycosyl hydrolase family 10 protein | chr4:16223694-16226095 REVERSEhighly similar to ( 562) loc_os03g10478 12003.m06501 protein 1,4-beta-xylanase, putative, expressedGlyco_10 Glyco_hydro_10 XynA no original description	3.04837
10.6.2	cell wall.degradation.mannan-xylose-arabinose-fucose	potri.016g138600	highly similar to ( 672) AT5G01930 | Symbols: | (1-4)-beta-mannan endohydrolase, putative | chr5:361189-362867 REVERSEmoderately similar to ( 494) loc_os05g25480 12005.m06841 protein hydrolase, hydrolyzing O-glycosyl compounds, putative, expressedCOG3934 no original description	-2.4486
10.6.3	cell wall.degradation.pectate lyases and polygalacturonases	potri.008g048600	highly similar to ( 565) AT3G55140 | Symbols: | pectate lyase family protein | chr3:20439060-20440225 FORWARDweakly similar to ( 154) PEL_TOBAC Pectate lyase precursor (EC 4.2.2.2) - Nicotiana tabacum (Common tobacco)moderately similar to ( 457) loc_os01g36620 12001.m09957 protein pectate lyase 4 precursor, putative, expressedAmb_all PelB Pec_lyase_C no original description	-4.18707
10.6.3	cell wall.degradation.pectate lyases and polygalacturonases	potri.011g159000	highly similar to ( 643) AT1G23460 | Symbols: | polygalacturonase | chr1:8327382-8329622 FORWARDmoderately similar to ( 350) PGLR_ACTCH Polygalacturonase precursor (EC 3.2.1.15) (PG) (Pectinase) - Actinidia chinensis (Kiwi) (Yangtao)moderately similar to ( 481) loc_os02g03750 12002.m05724 protein polygalacturonase precursor, putative, expressedGlyco_hydro_28 PGU1 no original description	-3.3496
10.6.3	cell wall.degradation.pectate lyases and polygalacturonases	potri.001g463000	highly similar to ( 611) AT1G70500 | Symbols: | polygalacturonase, putative / pectinase, putative | chr1:26566579-26568729 REVERSEmoderately similar to ( 353) PGLR_ACTCH Polygalacturonase precursor (EC 3.2.1.15) (PG) (Pectinase) - Actinidia chinensis (Kiwi) (Yangtao)moderately similar to ( 468) loc_os02g03750 12002.m05724 protein polygalacturonase precursor, putative, expressedGlyco_hydro_28 PGU1…	-5.1548
10.7	cell wall.modification	potri.013g152400	moderately similar to ( 444) AT4G03210 | Symbols: XTH9 | XTH9 (XYLOGLUCAN ENDOTRANSGLUCOSYLASE/HYDROLASE 9); hydrolase, acting on glycosyl bonds / xyloglucan:xyloglucosyl transferase | chr4:1416107-1417197 FORWARDmoderately similar to ( 307) XTH_WHEAT Probable xyloglucan endotransglucosylase/hydrolase precursor (EC 2.4.1.207) - Triticum aestivum (Wheat)moderately similar to ( 352) loc_os04g53950 …	2.34774
10.7	cell wall.modification	potri.018g098200	weakly similar to ( 116) AT4G30380 | Symbols: EXLB2 | EXLB2 (EXPANSIN-LIKE B2 PRECURSOR) | chr4:14860486-14860994 FORWARDweakly similar to ( 135) loc_os06g47360 12006.m09262 protein blight-associated protein p12 precursor, putative, expressed no original description	-2.74948
10.7	cell wall.modification	potri.002g060500	moderately similar to ( 411) AT4G14130 | Symbols: XTR7 | XTR7 (XYLOGLUCAN ENDOTRANSGLYCOSYLASE 7); hydrolase, acting on glycosyl bonds / hydrolase, hydrolyzing O-glycosyl compounds / xyloglucan:xyloglucosyl transferase | chr4:8137161-8138196 REVERSEmoderately similar to ( 404) BRU1_SOYBN Brassinosteroid-regulated protein BRU1 precursor - Glycine max (Soybean)moderately similar to ( 371) loc_os06g…	-2.05469
10.7	cell wall.modification	potri.003g083200	moderately similar to ( 315) AT4G17030 | Symbols: ATEXLB1, EXPR, AT-EXPR, ATEXPR1, ATHEXP BETA 3.1 | ATEXLB1 (ARABIDOPSIS THALIANA EXPANSIN-LIKE B1) | chr4:9581817-9583181 REVERSEmoderately similar to ( 203) EXLB1_ORYSA Expansin-like B1 precursor (OsEXLB1) (Expensin-related 1) (OsEXPR1) (OsaEXPb3.1) - Oryza sativa (Rice)moderately similar to ( 203) loc_os07g31390 12007.m07408 protein expansin-rel…	-2.83601
10.7	cell wall.modification	potri.001g136100	moderately similar to ( 465) AT1G32170 | Symbols: XTR4, XTH30 | XTR4 (XYLOGLUCAN ENDOTRANSGLYCOSYLASE 4); hydrolase, acting on glycosyl bonds / hydrolase, hydrolyzing O-glycosyl compounds / xyloglucan:xyloglucosyl transferase | chr1:11575434-11577776 FORWARDmoderately similar to ( 201) XTH_TOBAC Probable xyloglucan endotransglucosylase/hydrolase protein precursor (EC 2.4.1.207) - Nicotiana tabacu…	-2.04314
10.7	cell wall.modification	potri.019g125000	moderately similar to ( 449) AT4G03210 | Symbols: XTH9 | XTH9 (XYLOGLUCAN ENDOTRANSGLUCOSYLASE/HYDROLASE 9); hydrolase, acting on glycosyl bonds / xyloglucan:xyloglucosyl transferase | chr4:1416107-1417197 FORWARDmoderately similar to ( 309) XTH_SOYBN Probable xyloglucan endotransglucosylase/hydrolase precursor (EC 2.4.1.207) (Fragment) - Glycine max (Soybean)moderately similar to ( 347) loc_os04…	3.66645
10.8.1	cell wall.pectin*esterases.PME	potri.006g135100	moderately similar to ( 461) AT5G20860 | Symbols: | pectinesterase family protein | chr5:7076890-7079077 REVERSEmoderately similar to ( 401) PME2_CITSI Pectinesterase-2 precursor (EC 3.1.1.11) (Pectin methylesterase) (PE) - Citrus sinensis (Sweet orange)moderately similar to ( 374) loc_os07g47830 12007.m08998 protein pectinesterase-1 precursor, putative, expressedPectinesterase PemB PRK10531 no o…	2.65757
10.8.1	cell wall.pectin*esterases.PME	potri.011g025400	highly similar to ( 607) AT1G11580 | Symbols: ATPMEPCRA, PMEPCRA | PMEPCRA (METHYLESTERASE PCR A); enzyme inhibitor/ pectinesterase | chr1:3888730-3890649 FORWARDmoderately similar to ( 437) PME3_CITSI Pectinesterase-3 precursor (EC 3.1.1.11) (Pectin methylesterase 3) (PE 3) - Citrus sinensis (Sweet orange)highly similar to ( 516) loc_os01g57854 12001.m11933 protein pectinesterase-1 precursor, pu…	-2.48748
10.8.1	cell wall.pectin*esterases.PME	potri.002g145500	highly similar to ( 655) AT2G45220 | Symbols: | pectinesterase family protein | chr2:18644281-18646394 REVERSEhighly similar to ( 718) PME2_CITSI Pectinesterase-2 precursor (EC 3.1.1.11) (Pectin methylesterase) (PE) - Citrus sinensis (Sweet orange)moderately similar to ( 422) loc_os01g21034 12001.m42984 protein pectinesterase-2 precursor, putative, expressedPectinesterase PemB PMEI PRK10531 no or…	-2.15733

## Sheet: ERF
BinCode	BinName	id	description	log2FoldChange
27.3.3	RNA.regulation of transcription.AP2/EREBP, APETALA2/Ethylene-responsive element binding protein family	potri.019g073300	weakly similar to ( 139) AT1G22810 | Symbols: | AP2 domain-containing transcription factor, putative | chr1:8074535-8074969 REVERSEvery weakly similar to (96.7) loc_os01g66270 12001.m12735 protein transcriptional factor TINY, putativeAP2 AP2 no original description	-3.83861
27.3.3	RNA.regulation of transcription.AP2/EREBP, APETALA2/Ethylene-responsive element binding protein family	potri.003g050700	weakly similar to ( 161) AT5G11590 | Symbols: TINY2 | TINY2 (TINY2); DNA binding / transcription factor | chr5:3727789-3728499 REVERSEweakly similar to ( 134) loc_os01g10370 12001.m07658 protein transcriptional factor TINY, putative, expressedAP2 AP2 no original description	-2.3757
27.3.3	RNA.regulation of transcription.AP2/EREBP, APETALA2/Ethylene-responsive element binding protein family	potri.006g238600	weakly similar to ( 191) AT5G11590 | Symbols: TINY2 | TINY2 (TINY2); DNA binding / transcription factor | chr5:3727789-3728499 REVERSEweakly similar to ( 135) loc_os01g10370 12001.m07658 protein transcriptional factor TINY, putative, expressedAP2 AP2 no original description	2.62487
27.3.3	RNA.regulation of transcription.AP2/EREBP, APETALA2/Ethylene-responsive element binding protein family	potri.006g104200	very weakly similar to (86.3) AT5G05410 | Symbols: DREB2A, DREB2 | DREB2A; DNA binding / transcription activator/ transcription factor | chr5:1602650-1603657 FORWARDvery weakly similar to (91.3) loc_os01g07120 12001.m07339 protein dehydration-responsive element-binding protein 2A, putative, expressedAP2 AP2 no original description	-3.1689
27.3.3	RNA.regulation of transcription.AP2/EREBP, APETALA2/Ethylene-responsive element binding protein family	potri.018g085700	weakly similar to ( 150) AT5G11590 | Symbols: TINY2 | TINY2 (TINY2); DNA binding / transcription factor | chr5:3727789-3728499 REVERSEweakly similar to ( 131) loc_os10g41130 12010.m06878 protein DREB-like protein, putative, expressedAP2 AP2 no original description	2.21133

## Sheet: Ethylene
BinCode	BinName	id	description	log2FoldChange
17.5.1	hormone metabolism.ethylene.synthesis-degradation	potri.011g164200	moderately similar to ( 305) AT4G10490 | Symbols: | oxidoreductase, 2OG-Fe(II) oxygenase family protein | chr4:6483900-6485179 FORWARDweakly similar to ( 164) GAOX1_ORYSA Gibberellin 20 oxidase 1 (EC 1.14.11.-) (Gibberellin C-20 oxidase 1) (GA 20-oxidase 1) (Os20ox) - Oryza sativa (Rice)moderately similar to ( 292) loc_os04g49210 12004.m09856 protein naringenin,2-oxoglutarate 3-dioxygenase, putat…	-5.65957
17.5.1	hormone metabolism.ethylene.synthesis-degradation	potri.002g191900	moderately similar to ( 393) AT1G02400 | Symbols: ATGA2OX4, ATGA2OX6, DTA1, GA2OX6 | GA2OX6 (GIBBERELLIN 2-OXIDASE 6); gibberellin 2-beta-dioxygenase | chr1:486964-489391 FORWARDmoderately similar to ( 469) G2OX2_PEA Gibberellin 2-beta-dioxygenase 2 (EC 1.14.11.13) (Gibberellin 2-beta-hydroxylase 2) (Gibberellin 2-oxidase 2) (GA 2-oxidase 2) - Pisum sativum (Garden pea)moderately similar to ( 296…	-2.38223
17.5.1	hormone metabolism.ethylene.synthesis-degradation	potri.006g101100	moderately similar to ( 459) AT5G05600 | Symbols: | oxidoreductase, 2OG-Fe(II) oxygenase family protein | chr5:1672266-1674602 FORWARDmoderately similar to ( 259) LDOX_MALDO Leucoanthocyanidin dioxygenase (EC 1.14.11.19) (LDOX) (Leucocyanidin oxygenase) (Leucoanthocyanidin hydroxylase) (Anthocyanidin synthase) - Malus domestica (Apple) (Malus sylvestris)moderately similar to ( 422) loc_os01g61610…	-2.77315
17.5.1	hormone metabolism.ethylene.synthesis-degradation	potri.001g451300	moderately similar to ( 320) AT4G10490 | Symbols: | oxidoreductase, 2OG-Fe(II) oxygenase family protein | chr4:6483900-6485179 FORWARDweakly similar to ( 162) FL3H_DIACA Naringenin,2-oxoglutarate 3-dioxygenase (EC 1.14.11.9) (Flavonone-3-hydroxylase) (F3H) (FHT) - Dianthus caryophyllus (Carnation) (Clove pink)moderately similar to ( 296) loc_os04g49210 12004.m09856 protein naringenin,2-oxoglutara…	-2.01418
17.5.1	hormone metabolism.ethylene.synthesis-degradation	potri.010g231500	moderately similar to ( 463) AT2G36690 | Symbols: | oxidoreductase, 2OG-Fe(II) oxygenase family protein | chr2:15379930-15381987 FORWARDweakly similar to ( 185) LDOX_MALDO Leucoanthocyanidin dioxygenase (EC 1.14.11.19) (LDOX) (Leucocyanidin oxygenase) (Leucoanthocyanidin hydroxylase) (Anthocyanidin synthase) - Malus domestica (Apple) (Malus sylvestris)moderately similar to ( 382) loc_os08g44590 1…	-3.14682
17.5.1	hormone metabolism.ethylene.synthesis-degradation	potri.009g099200	moderately similar to ( 239) AT4G34120 | Symbols: LEJ1, CDCP1 | LEJ1 (LOSS OF THE TIMING OF ET AND JA BIOSYNTHESIS 1) | chr4:16341194-16342893 FORWARDmoderately similar to ( 228) loc_os08g22149 12008.m06246 protein IMP dehydrogenase, putative, expressedCBS CBS_pair_23 CBS_pair_BON_assoc no original description	-4.602
17.5.1	hormone metabolism.ethylene.synthesis-degradation	potri.004g022800	moderately similar to ( 434) AT4G21200 | Symbols: ATGA2OX8, GA2OX8 | GA2OX8 (GIBBERELLIN 2-OXIDASE 8); gibberellin 2-beta-dioxygenase | chr4:11302751-11304032 FORWARDweakly similar to ( 152) ACCO1_ORYSA 1-aminocyclopropane-1-carboxylate oxidase 1 (EC 1.14.17.4) (ACC oxidase 1) (Ethylene-forming enzyme) (EFE) - Oryza sativa (Rice)moderately similar to ( 329) loc_os02g41954 12002.m09232 protein gib…	-2.54615
17.5.1	hormone metabolism.ethylene.synthesis-degradation	potri.005g184400	moderately similar to ( 376) AT5G51810 | Symbols: GA20OX2, AT2353, ATGA20OX2 | GA20OX2 (GIBBERELLIN 20 OXIDASE 2); gibberellin 20-oxidase | chr5:21055389-21056746 REVERSEmoderately similar to ( 385) GAOX2_ORYSA Gibberellin 20 oxidase 2 (EC 1.14.11.-) (Gibberellin C-20 oxidase 2) (GA 20-oxidase 2) (Os20ox2) (Semidwarf-1 protein) - Oryza sativa (Rice)moderately similar to ( 385) loc_os01g66100 1200…	-3.36703
17.5.1	hormone metabolism.ethylene.synthesis-degradation	potri.004g139700	moderately similar to ( 429) AT5G08640 | Symbols: FLS | FLS (FLAVONOL SYNTHASE); flavonol synthase | chr5:2804009-2805175 FORWARDmoderately similar to ( 449) FLS_PETHY Flavonol synthase/flavanone 3-hydroxylase (EC 1.14.11.23) (EC 1.14.11.9) (FLS) - Petunia hybrida (Petunia)moderately similar to ( 359) loc_os02g52840 12002.m10314 protein flavonol synthase/flavanone 3-hydroxylase, putative, express…	2.20025
17.5.1	hormone metabolism.ethylene.synthesis-degradation	potri.002g040700	moderately similar to ( 329) AT1G06650 | Symbols: | 2-oxoglutarate-dependent dioxygenase, putative | chr1:2035909-2037186 FORWARDmoderately similar to ( 320) DV4H_CATRO Desacetoxyvindoline 4-hydroxylase (EC 1.14.11.20) - Catharanthus roseus (Rosy periwinkle) (Madagascar periwinkle)moderately similar to ( 288) loc_os03g48430 12003.m09851 protein 1-aminocyclopropane-1-carboxylate oxidase, putative,…	2.36548
17.5.1	hormone metabolism.ethylene.synthesis-degradation	potri.001g382400	moderately similar to ( 435) AT1G17020 | Symbols: SRG1, ATSRG1 | SRG1 (SENESCENCE-RELATED GENE 1); oxidoreductase, acting on diphenols and related substances as donors, oxygen as acceptor / oxidoreductase, acting on paired donors, with incorporation or reduction of molecular oxygen, 2-oxoglutarate as one donor, and inc | chr1:5820258-5821741 FORWARDweakly similar to ( 188) FLS_PETHY Flavonol synt…	-5.34952
17.5.1	hormone metabolism.ethylene.synthesis-degradation	potri.009g022800	moderately similar to ( 294) AT4G25300 | Symbols: | oxidoreductase, 2OG-Fe(II) oxygenase family protein | chr4:12945780-12946642 FORWARDmoderately similar to ( 226) FLS_SOLTU Flavonol synthase/flavanone 3-hydroxylase (EC 1.14.11.23) (EC 1.14.11.9) (FLS) - Solanum tuberosum (Potato)moderately similar to ( 282) loc_os10g41020 12010.m06867 protein flavonol synthase/flavanone 3-hydroxylase, putative,…	-3.72051
17.5.1.1	hormone metabolism.ethylene.synthesis-degradation.1-aminocyclopropane-1-carboxylate synthase	potri.002g163700	highly similar to ( 693) AT3G61510 | Symbols: ACS1, AT-ACS1 | ACS1 (ACC SYNTHASE 1); 1-aminocyclopropane-1-carboxylate synthase | chr3:22763495-22765730 REVERSEhighly similar to ( 712) 1A1C_TOBAC 1-aminocyclopropane-1-carboxylate synthase (EC 4.4.1.14) (ACC synthase) (S-adenosyl-L-methionine methylthioadenosine-lyase) - Nicotiana tabacum (Common tobacco)highly similar to ( 627) loc_os04g48850 120…	-4.93508
17.5.2	hormone metabolism.ethylene.signal transduction	potri.005g007500	weakly similar to ( 144) AT2G44930 | Symbols: | unknown protein | chr2:18529700-18531671 REVERSEweakly similar to ( 101) loc_os01g38120 12001.m10097 protein conserved hypothetical proteinDUF247 no original description	2.47868
17.5.2	hormone metabolism.ethylene.signal transduction	potri.013g045200	weakly similar to ( 159) AT3G23240 | Symbols: ERF1, ATERF1 | ERF1 (ETHYLENE RESPONSE FACTOR 1); DNA binding / transcription activator/ transcription factor | chr3:8295705-8296361 FORWARDvery weakly similar to (80.5) ERF1_TOBAC Ethylene-responsive transcription factor 1 (Ethylene-responsive element-binding factor 1) (EREBP-1) (NtERF1) - Nicotiana tabacum (Common tobacco)weakly similar to ( 122) lo…	-4.09315
17.5.2	hormone metabolism.ethylene.signal transduction	potri.010g072400	very weakly similar to (80.5) AT3G23230 | Symbols: | ethylene-responsive factor, putative | chr3:8289647-8290066 REVERSEAP2 AP2 no original description	-2.961
17.5.3	hormone metabolism.ethylene.induced-regulated-responsive-activated	potri.008g142700	weakly similar to ( 103) AT1G31050 | Symbols: | transcription factor | chr1:11076109-11078008 REVERSEweakly similar to ( 155) loc_os02g45010 12002.m09541 protein expressed protein no original description	3.13847

## Sheet: Glutathione-S-transferase
BinCode	BinName	id	description	log2FoldChange
26.9	misc.glutathione S transferases	potri.010g032800	moderately similar to ( 292) AT1G10370 | Symbols: GST30, ATGSTU17, GST30B, ERD9 | ERD9 (EARLY-RESPONSIVE TO DEHYDRATION 9); glutathione transferase | chr1:3397274-3398273 REVERSEmoderately similar to ( 224) GSTU6_ORYSA Probable glutathione S-transferase GSTU6 (EC 2.5.1.18) (28 kDa cold-induced protein) - Oryza sativa (Rice)moderately similar to ( 236) loc_os10g38140 12010.m06597 protein glutathio…	2.2822
26.9	misc.glutathione S transferases	potri.017g138800	moderately similar to ( 264) AT5G17220 | Symbols: ATGSTF12, GST26, TT19 | ATGSTF12 (ARABIDOPSIS THALIANA GLUTATHIONE S-TRANSFERASE PHI 12); glutathione transferase | chr5:5658528-5659322 FORWARDweakly similar to ( 179) GSTF2_TOBAC Glutathione S-transferase APIC (EC 2.5.1.18) (GST class-phi) - Nicotiana tabacum (Common tobacco)weakly similar to ( 185) loc_os03g04260 12003.m05957 protein glutathion…	-2.52521
26.9	misc.glutathione S transferases	potri.002g015100	weakly similar to ( 194) AT3G03190 | Symbols: ATGSTF11, ATGSTF6 | ATGSTF11 (GLUTATHIONE S-TRANSFERASE F11); glutathione transferase | chr3:735071-735877 FORWARDweakly similar to ( 171) GSTF1_TOBAC Glutathione S-transferase PARB (EC 2.5.1.18) (GST class-phi) - Nicotiana tabacum (Common tobacco)moderately similar to ( 263) loc_os03g04260 12003.m05957 protein glutathione S-transferase, putative, exp…	2.68618
26.9	misc.glutathione S transferases	potri.001g394800	moderately similar to ( 222) AT1G17180 | Symbols: ATGSTU25 | ATGSTU25 (GLUTATHIONE S-TRANSFERASE TAU 25); glutathione transferase | chr1:5872208-5872958 FORWARDmoderately similar to ( 238) GSTXA_TOBAC Probable glutathione S-transferase parA (EC 2.5.1.18) (Auxin-regulated protein parA) (STR246C protein) - Nicotiana tabacum (Common tobacco)weakly similar to ( 187) loc_os09g20220 12009.m05229 protei…	-4.56105
26.9	misc.glutathione S transferases	potri.012g052200	moderately similar to ( 214) AT2G29420 | Symbols: ATGSTU7, GST25 | ATGSTU7 (ARABIDOPSIS THALIANA GLUTATHIONE S-TRANSFERASE TAU 7); glutathione transferase | chr2:12618111-12618871 REVERSEmoderately similar to ( 214) GSTX6_SOYBN Probable glutathione S-transferase (EC 2.5.1.18) (Heat shock protein 26A) (G2-4) - Glycine max (Soybean)moderately similar to ( 215) loc_os09g29200 12009.m06071 protein gl…	-2.02482
26.9	misc.glutathione S transferases	potri.004g080400	moderately similar to ( 222) AT1G78380 | Symbols: ATGSTU19, GST8 | ATGSTU19 (GLUTATHIONE S-TRANSFERASE TAU 19); glutathione binding / glutathione transferase | chr1:29486659-29487819 REVERSEmoderately similar to ( 230) GSTX4_TOBAC Probable glutathione S-transferase (EC 2.5.1.18) (Auxin-induced protein PCNT107) - Nicotiana tabacum (Common tobacco)weakly similar to ( 200) loc_os09g20220 12009.m0522…	3.21185
26.9	misc.glutathione S transferases	potri.011g114000	moderately similar to ( 257) AT1G17180 | Symbols: ATGSTU25 | ATGSTU25 (GLUTATHIONE S-TRANSFERASE TAU 25); glutathione transferase | chr1:5872208-5872958 FORWARDmoderately similar to ( 278) GSTXC_TOBAC Probable glutathione S-transferase parC (EC 2.5.1.18) (Auxin-regulated protein parC) - Nicotiana tabacum (Common tobacco)moderately similar to ( 233) loc_os09g20220 12009.m05229 protein glutathione …	-4.054
26.9	misc.glutathione S transferases	potri.015g042000	weakly similar to ( 194) AT2G29460 | Symbols: ATGSTU4, GST22 | ATGSTU4 (ARABIDOPSIS THALIANA GLUTATHIONE S-TRANSFERASE TAU 4); glutathione transferase | chr2:12626689-12627600 REVERSEweakly similar to ( 199) GSTX6_SOYBN Probable glutathione S-transferase (EC 2.5.1.18) (Heat shock protein 26A) (G2-4) - Glycine max (Soybean)weakly similar to ( 189) loc_os09g29200 12009.m06071 protein glutathione S-…	-3.72679
26.9	misc.glutathione S transferases	potri.016g083500	moderately similar to ( 325) AT5G02790 | Symbols: | In2-1 protein, putative | chr5:632877-634858 FORWARDmoderately similar to ( 259) IN21_MAIZE IN2-1 protein - Zea mays (Maize)moderately similar to ( 290) loc_os03g17470 12003.m07174 protein IN2-1 protein, putative, expressedGST_C_Lambda no original description	-2.79186

[truncated: 13 more sheets: Heat shock proteins, JA, MAPK, MYB, Peroxidases, Proteolysis, PR-proteins, Redoxstate, Respiratory burst, SA, Secondary metabolites, Signalings, WRKY]
